# Supplementary material for: Drosophila hedgehog can act as a morphogen in the absence of regulated Ci processing
Source: eLife. 2020 Oct 21;9:e61083. doi: 10.7554/eLife.61083 (PMC7679133; doi:10.7554/eLife.61083)
Supplement: Figure 2—figure supplement 1—source data 1. [file elife-61083-fig2-figsupp1-data1.xlsx]

## Sheet: K M P
	K						M					P
	Wt	Wt	Wt sufu	Rdx	Rdx Sufu		crWt	Wt Sufu	Rdx	Rdx Sufu		crWt	S849A	1270-137-	CiP(1-3)A
	Ptc	Ci-155	Ci-155	Ci-155	Ci-155		ptc	ptc	ptc	ptc		ptc	ptc	plz	ptc
	43.857	52.6192	50.8571	39.9522	51.8095		11.2857	5.85733	13.619	4.048		24.7143	43.7143	41.7778	42
	42.0957	51.143	49.6429	41.5236	50.1429		14.0953	6.381	13.7143	3.47633		22.9523	43.5713	44.3335	41.238
	44.6667	53.4764	52.2857	43.8094	52.4286		13.6667	6.90467	14.1903	4.19033		25.762	43.9523	43.4445	39.2857
	44.7143	55.6664	48.6429	46.0475	51.0476		16.1903	6.19033	14.4287	4.238		24.8093	44.3333	43.4444	41.8093
	42.9523	55.0477	49	46.3334	50.7143		12.2377	5.52367	15.3813	3.09533		26.4763	43.6667	43.1112	42.0953
	45.762	56.8095	52.7857	44.7142	51		16.476	4.66667	16.143	4.23833		24.238	42.6193	42.8888	42.7143
	44.8093	56.381	52.1428	48.381	52.1429		15.9047	5.85733	18.3333	4.52367		26.8573	42.7143	43.4444	40.619
	46.4763	60.5237	50.5	47.381	53.0476		20.0477	5.80933	20.238	4.80933		26.238	41.381	43.4443	45.1427
	44.238	57.3332	47.5	48.6191	53.4762		24.7617	5.381	22.9047	5.28567		26.0953	39.4283	41.5556	41.1907
	46.8573	61.2382	47.8571	48.2857	51.5714		27	6.47633	25.2853	8		26.1903	38.9047	42.4446	40.762
	46.238	59.6668	46.8572	50.381	54.8571		28.7143	7.619	26.9997	9.238		26.6663	39.5713	46.111	41.9527
	46.0953	60.6665	48.8571	52.4762	53.8095		31.8093	12.4283	31.7143	9.90467		27.9523	38.476	43.1111	43.238
	46.1903	59.9047	50.9286	52.6189	55.4286		34.762	20.1427	36.7143	14.095		24.7147	39.6667	38.1111	43.7143
	46.6663	60.1428	50.9286	54.238	56.8571		45.524	27.9523	44.7617	18.857		26.1907	40.6667	39.9999	42.7617
	47.9523	60.7617	53.3571	53.0953	55.0953		50.3333	38.4287	53.5713	28.619		29.238	40.7617	42.8889	42.714
	44.7147	58.9046	56.8571	54.0951	57.2381		63.524	51.9523	64.381	46.6667		26.8573	41.8097	42.8888	44.9523
	46.1907	60.1906	53.5	53.3333	56.3333		71.9047	68.0953	80.429	62.8573		27.7143	42.4763	38.6666	42.7617
	49.238	63.8571	56.0714	54.9048	54.7619		93	89.905	101.762	81.8573		26.2857	42.5237	38.8889	43.1427
	46.8573	61.2381	52.7143	55.9997	55.0952		105.905	111.238	126.667	111		29.0953	41.0953	39.5557	41.8097
	47.7143	61.3335	54.0714	55.6666	58		120.048	136.381	154.428	138.524		28.6667	40.4287	43.4445	45.143
	46.2857	62.286	59.7857	59.5715	56.4762		126.524	153.762	159.762	151.952		31.1903	39.619	45.9999	45.524
	49.0953	65.9521	57.1429	61.619	53.7143		121.762	144.143	145.095	143.667		27.2377	38.7617	42	43.5237
	48.6667	69.5239	57.9286	60.6665	55.8572		111.238	96.7147	103.762	89.381		31.476	38	45.1112	47.0477
	51.1903	72.5714	62.2143	59.6667	56.4286		57.476	44.4763	45.524	37.476		30.9047	37.143	47.111	48.7617
	47.2377	70.9049	57.5	63.6188	54.5714		21.9047	30.6663	22.7143	22.8573		35.0477	37.048	47.5556	47.1907
	51.476	80.2378	51.9286	66.2381	55.3334		17.3333	33.714	18.619	29.238		39.7617	38.0477	51.3332	47.524
	50.9047	78.5713	54.5	70.3333	53.5714		17.762	40.667	19.0477	35		42	40.3333	56.7779	52.5713
	55.0477	83.8097	52.2858	75.1428	53.7143		21.1903	39.905	22.2857	36.619		43.7143	41.3333	57.3332	56.6667
	59.7617	89.619	51.7143	81.2381	55.2857		18.6193	36.619	23.6187	31.619		46.8093	44.9047	60.5556	60
	62	93.0952	50.5	83.381	59.7619		24.381	34.238	23.476	36.6667		49.762	48.4287	60.889	67.3333
	63.7143	91.5236	54.2858	86.4764	60.7143		24.381					60.524	53.143	68.1111	74.8097
	66.8093	95.0477	55.4286	90.9046	57.9524							65.3333	60.1427	77.889	83.7143
	69.762	95.8573	65.7858	95.0475	60.8095							78.524	72.095	79.3333	96.8097
	80.524	103.286	59.7142	99.4764	62.7143							86.9047	90.4763	79.3334	108.047
	85.3333	102.428	65.0714	107.333	63.8095							108	99.1427	94.5556	124.952
	98.524	104.619	66	108.714	69.5714							120.905	111.715	114.222	140.286
	106.905	104.095	66.8572	112.333	69.8095							135.048	125.476	112.444	144.952
	128	101.667	75.8571	107.19	67.2381							141.524	135.952	103.333	136.143
	140.905	92.2859	73.0714	95.9049	67.8095							136.762	154.333	79.1112	103.048
	155.048	80.0951	72.1428	86.6666	65.0952							126.238	152.619	51.5555	67.0003
	161.524	69.5716	71.2857	72.714	57.0952							72.476	138.524	44.9999	44.9523
	156.762	61.9522	65.5714	58.0479	53.8095							36.9047	93.048	42.6667	37.2857
	146.238	59.286	61.6429	51.9522	43.7619							32.3333	53.857	42.4443	34.8097
	92.476	43.8573	47.1428	42.8094	38.1905							32.762	39.8573	47.8888	37.095
	56.9047	35.1903	39.7857	39.3332	38.0953							36.1903	37.619	47.6667	38.7143
	52.3333	34.5239	36.7143	37.4288	37.2381							33.6193	35.4763	44.2223	41.3333
	52.762	33.1906	37.5	36.7142	33.7143							39.381	34.7617	44.889	44.4283
	56.1903	34.6668	39.2142	38.238	35							36.9997	34.2383	43.8888	30.238
	53.6193	32.476	38.5	38.9523	31.3333							37.8093	34.238	45
	59.381	34.9048	38	37.8572	32
	56.9997	34.8095	38.1429	36.381	26.619
	57.8093	35.2383	35.7857	37.4286	24.8095
	56.714	34.5713	37.5714	36.7618	24.0952
	58.1427	35	38.1428	37.3331	23.0952
	56.095	33.6193	38.3571	37	19.2857
	53.9523	34.2382	38.0714	37.9522	19.0476
	49	30.4285	42.9286	34.5716	18.0476
	45.8093	29.4287	36.5714	28.3809	17.0953
	47.3807	29.5239	34	23.3333	14.4762
	47.4287	30.1429	33.2142	19.4761	12.8095
	50.1427	31.5238	34.2857	17.5714	11.1428
	49.5713	30.7144	29.7857	16.2381	8.52383
	48.7143	30.0952	18.0714	14.1429	6.5238
	48.5713	30.0477	-0.4286	11.1428	5.04763
	46.0477	29.1904	-13.8572	6.52377	1.4762
	44.6187	28	-21.7857	2.57143	0.380933

## Sheet: A, B, D, E, F
Wt			S849A			P(1-3)A			∆1270-1370			Rdx
plz	2A1		plz	2A1		plz	2A1		plz	2A1		plz	Ci-155
2.66003	34.7582		26.1753	125.747		16.0614	102.676		146.079	1367.39		24.2233	61.5953
3.71893	34.5098		26.453	127.605		16.5176	105.342		143.868	1347		24.2873	62.0962
3.63417	34.0523		27.6363	130.493		16.4737	103.562		142.158	1418.71		24.1913	62.0787
3.49643	33.4836		27.703	130.365		16.1228	102.588		143.658	1484.13		24.0283	61.6286
4.15707	34.536		27.5487	128.723		16.1754	99.4387		145.158	1522.18		24.1633	61.5567
3.21567	34.634		26.4297	129.036		15.8684	95.8507		148.053	1579.11		24.2523	61.6243
3.54907	33.1176		27.2557	127.933		15.4737	95.57		151.868	1675.29		24.2933	61.7201
3.64043	32.9477		28.2507	128.938		15.7982	95.3337		155.737	1685.79		24.5107	61.5132
3.25477	35		26.6963	129.788		16.1053	95.518		151.5	1686.82		24.6417	61.228
3.1894	35.9477		26.477	130.023		16.3509	98.1577		148.553	1711.32		24.5837	61.3725
3.52933	35.1438		26.9667	129.857		16.2807	101.14		153.579	1603.05		24.4087	61.2843
3.21597	33.902		27.6413	132.099		16.114	100.763		156.237	1628.79		24.3893	60.895
2.86927	33.7974		27.9827	132.811		15.9035	102.483		156.658	1663.37		24.2037	60.7985
3.16337	34.1373		29.4543	131.662		15.8158	101.623		156.105	1560.87		24.0617	60.7156
3.8039	34.9608		31.011	130.478		16.0176	100.193		163.789	1586.68		24.01	60.1404
3.02613	35.4183		30.1777	128.493		15.5702	98.658		164.842	1552.53		23.989	59.6501
3.26153	33.9673		30.2157	129.373		15.4912	97.57		161.868	1500.53		24.0813	59.3214
3.22863	34.5359		28.947	128.365		14.9737	98.456		161.447	1434.76		24.0977	59.5374
3.24193	35.2745		28.6983	124.727		15.5965	99.193		155.789	1369.29		24.1443	59.8784
3.6076	35.4052		30.5237	124.375		15.9474	101.842		160.842	1383.18		24.1073	59.8576
3.31393	35.6601		31.145	122.11		16.421	100.982		159.605	1407.63		24.223	60.0878
3.09153	35.4379		31.7733	121.036		16.4649	102.526		153.947	1525.92		24.4117	60.1887
3.20923	33.9804		30.2283	122.435		15.8772	101.097		158.184	1524.97		24.423	59.8954
2.48343	34.5425		29.359	121.325		15.8596	97.3243		157.868	1555.37		24.4423	59.8287
2.75827	33.6275		29.658	120.203		16.0789	92.991		154.711	1621.92		24.6077	60.1118
2.38557	34.1177		29.815	121.028		15.6053	93.8947		153.132	1659.37		24.537	60.1427
2.3399	32.9608		30.048	122.826		15.8684	95.7107		146.816	1670.47		24.5217	60.4346
2.96087	32.6144		30.7763	122.363		15.9912	95.6403		149.289	1685.89		24.4593	60.2397
3.13713	32.9869		30.7983	123.09		15.9737	95.7543		146.474	1597		24.4473	59.8264
3.01283	35.0065		31.1297	123.575		15.807	96.7897		145.711	1531.92		24.4967	59.4742
2.11733	34.4118		30.254	125.44		15.6667	97.702		146.789	1564.42		24.4243	59.3329
1.24173	32.6274		30.1033	126.289		15.3509	98.4387		157.921	1587.32		24.269	59.581
1.88893	33.4444		30.305	127.174		14.9825	96.851		163.921	1572.08		24.226	59.8895
2.052	34.3595		29.634	125.986		15.5175	95.491		168.263	1552.18		24.3087	59.9819
2.15007	32.83		30.255	124.47		15.6316	95.3683		160.237	1597.95		24.468	60.2937
1.61453	35.1569		29.8707	125.955		15.6579	93.9213		154.553	1530.79		24.5743	60.6871
1.82343	34.8105		30.3383	125.846		15.8772	90.7457		148.579	1558.74		24.6287	61.3379
2.5491	35.8824		28.8803	124.025		16.2719	88.491		146.737	1580.34		24.588	61.6945
2.464	34.6078		27.7427	123.552		16.0965	88.0173		149.316	1644.05		24.4583	61.7607
1.93487	35.7516		28.0067	123.888		16.1316	86.868		150.816	1739.32		24.4113	61.7447
2.33957	36.2157		29.5737	124.649		15.9825	87.2543		150.237	1740.21		24.398	61.5307
3.09783	36.5229		28.582	127.213		15.386	87.0087		155.026	1668.63		24.231	61.1345
2.1961	35.1438		28.7283	126.904		15.1053	87.7193		149.421	1570.47		24.0157	60.7437
2.13083	34.4314		30.597	126.575		15.0702	89.4647		148.632	1515.11		23.9967	60.5915
2.37903	35.0458		30.202	126.98		15.4912	88.991		156.263	1550.87		23.978	60.3725
2.3659	34.6732		29.3527	125.829		15.4561	89.377		152.632	1612.11		23.9103	60.4413
1.7318	34.6275		28.7967	124.141		15.4035	91.1053		151.737	1657.42		23.842	60.7666
1.6406	35.1896		29.1207	121.939		15.4386	91.193		155.5	1656.29		23.7933	61.1305
1.52283	34.9412		29.0303	120.626		15.3158	90.6227		152	1703.42		23.8253	61.7703
1.29393	34.8366		29.5257	120.792		15.5965	90.412		148	1697.5		23.7473	61.9728
1.56867	35.4379		30.0487	122.073		15.7807	85.0613		137.395	1680.79		23.6263	61.7026
2.15703	35.7386		29.659	122.327		15	84.105		139.263	1718.34		23.7047	61.2573
2.1109	36.0131		28.72	123.71		14.7456	84.342		135.763	1789.21		23.721	60.3992
2.08523	36.098		29.3927	123.576		15.421	84.93		135.684	1784.21		23.6253	60.0343
2.01297	35.6536		30.8037	125.069		15.5614	87.2457		133.211	1771.39		23.5107	59.6946
1.79077	33.817		31.1813	125.579		15.807	87.5877		133.184	1762.24		23.4203	59.8208
1.3202	33.1307		30.8053	123.666		15.9649	86.3947		134.421	1718.32		23.403	59.7874
1.75173	32.9412		29.6437	123.66		16.1491	86.7983		139.342	1709.79		23.473	60.1895
1.6142	34.2484		29.7483	125.517		15.7544	86.465		139.632	1640.18		23.4307	60.1711
1.94117	33.8497		29.6187	123.308		16.079	87.5967		144.105	1611.5		23.374	60.6292
2.24853	34.3595		29.2443	121.816		15.8421	89.9037		140.421	1568		23.538	61.1052
1.75797	34.2092		28.973	120.052		16.0088	91.9123		140.711	1648.79		23.6243	61.4588
2.43803	34.5621		29.478	120.793		15.8421	93.956		138.184	1658.37		23.5877	61.1766
1.8303	34.2941		29.777	118.774		16.2719	93.0527		138.105	1710		23.566	60.7453
2.41827	34.0915		29.9807	119.169		16.5965	91.8423		135.816	1771.61		23.432	60.5158
2.8823	34.5425		28.7213	118.115		16.1754	89.9737		141.237	1754		23.4657	60.4644
2.8104	34.9608		28.3207	116.176		16.2193	86.825		137.553	1703.34		23.6283	60.6158
2.82377	35.0654		28.4803	117.894		15.9912	86.7893		132.684	1594.11		23.6113	61.0447
2.30713	35.5948		27.9663	118.177		15.7632	88.6313		130.553	1598.79		23.646	61.453
3.0392	36.464		28.3417	119.143		16.1842	88.5963		139.526	1554.79		23.7563	61.5504
2.92787	34.7255		31.286	119.059		16.0351	89.4823		137.474	1508.5		23.621	61.7465
2.5099	35.2222		29.453	121.373		16.4123	88.0963		133.737	1522.61		23.584	61.4751
2.92827	35.8039		27.963	120.593		15.5965	84.0527		138.421	1511.95		23.6293	61.5583
2.31367	35.3138		27.2053	121.444		15.614	84.5967		139.895	1484.16		23.5327	61.5052
2.36593	36.6536		27.2177	121.309		15.1579	86.158		135.368	1517.68		23.326	61.2025
2.9216	35.9281		26.9113	120.357		15.4123	86.36		140.211	1545.71		23.253	60.7032
2.98687	35.2353		27.3743	120.082		15.6228	83.8423		140.316	1578.71		23.234	60.5658
2.9673	35.7974		28.1573	118.443		15.579	85.4823		140.079	1621.82		23.1103	60.3285
2.95423	35.2811		26.993	119.158		15.7632	87.8773		136.211	1539.97		23.122	60.0662
3.33333	33.8432		29.0293	118.061		15.5263	88.509		141.316	1473.32		23.2273	60.1441
3.35943	33.7908		30.3687	117.237		15.2105	86.0967		134.658	1389.45		23.036	60.0647
2.7057	33.4706		27.8873	117.689		15.0263	83.412		135.605	1299.08		22.975	60.0357
2.51613	33.5359		28.5903	117.759		15.0439	82.1317		133.868	1354.32		23.04	59.8059
2.98697	34.634		28.8667	117.956		14.8859	84.395		133.947	1372.08		23.06	59.5978
3.0263	36.3399		29.6097	119.238		14.5526	85.1493		137.526	1443.5		23.2173	59.8318
2.87587	37.5164		30.209	118.493		15.0263	85.7807		144.974	1549		23.2833	59.8956
3.58817	38.0131		28.696	121.58		15.0965	84.0437		141.974	1605.42		23.4073	59.7345
3.65343	38.0392		29.402	119.678		15.693	82.3073		132.237	1612.18		23.4727	59.7645
3.49677	37.3529		28.8267	118.355		15.4561	82.1753		130.421	1589.13		23.6033	60.0953
4.01327	37.4052		28.781	117.567		16.114	83.6403		131.5	1568.39		23.487	60.2206
4.8169	37.5229		29.1387	118.552		15.307	83.2367		134.921	1497.32		23.5833	60.1674
6.01303	39.0654		29.2983	119.433		15.193	81.8333		130.684	1581.55		23.5767	60.2746
5.5164	38.2026		28.4957	118.348		15.614	83.5703		129.684	1569.61		23.5297	60.399
4.3332	39.451		26.9223	117.06		15.5175	85.2893		127.868	1496.92		23.607	61.0897
4.8042	36.3791		26.383	117.16		15.5	85.0177		125.895	1399.97		23.6257	61.6241
6.039	36.3399		27.1443	118.866		15.114	83.737		124.974	1350.24		23.7043	61.6553
5.11753	36.4967		27.9647	120.562		15.4035	84.1403		128.395	1371.63		23.771	61.3414
4.64727	37.1634		29.0323	119.491		15.7193	83.2453		133.711	1464.76		23.645	61.1707
4.72527	36.0065		29.324	119.655		15.4474	83.9123		134.5	1488.34		23.654	60.9012
5.11773	35.536		26.879	120.076		15.5702	85.4473		132.395	1559.84		23.578	60.5212
4.32693	34.9346		25.6003	123.62		15.9825	85.9733		132.789	1597.87		23.5297	59.842
4.43777	34.9216		26.2477	121.705		16.1228	85.3423		131.395	1615.58		23.4533	59.1953
3.84343	35.9739		26.5513	122.589		15.8684	84.86		133.579	1593.42		23.2697	58.9689
4.26803	35.5948		24.5553	120.955		15.5263	84.0963		134.737	1595.76		23.2347	59.0756
4.08503	34.5163		25.837	121.815		15.4211	82.7017		126.158	1565.11		23.1877	59.1558
4.98037	34.8758		24.792	119.494		14.886	79.6667		134.026	1603.08		23.2033	58.9713
4.54923	35.6013		24.8803	119.185		14.6404	81.5877		141.132	1604.76		23.2233	59.0639
5.56197	35.9608		24.2273	118.041		14.3948	85.8947		140.5	1608.03		23.3213	59.2889
5.25483	34.0588		25.176	120.419		15.0526	86.649		139.447	1594.79		23.2923	59.4205
4.64067	33.9673		24.1267	121.294		15.4561	86.7193		134.553	1706.53		23.138	59.7241
5.34643	33.7516		23.0483	123.165		16.0351	85.4647		136.711	1781.5		22.8863	59.6958
5.9606	33.7321		23.111	125.526		15.5789	85.6317		131.921	1735.42		22.8887	59.4163
6.11767	35.1765		24.413	126.785		15.5526	83.5003		132.763	1798.95		22.8547	59.3867
7.84333	33.5556		22.6723	127.224		15.7105	84.333		133.105	1692.87		22.839	59.276
7.9609	34.8758		23.922	127.341		15.7018	85.842		133.263	1667.74		23.0097	59.4651
8.90167	36.4771		24.234	125.61		15.7193	86.5967		134.342	1545.5		22.9953	59.7069
8.46393	36.4575		25.1293	124.086		16.0351	88.737		137.474	1525.58		23.008	60.0292
7.8889	35.6144		25.371	124.418		15.9123	91.281		127.816	1577.03		23.0247	60.1808
7.2813	36.8562		25.9767	123.58		15.6404	92.307		123.474	1563.89		23.0733	60.0934
7.7715	38.4118		25.3027	121.771		15.0965	91.728		125.789	1650.63		23.1187	60.1391
8.38563	37.0784		24.997	120.703		15.4123	90.6753		132.816	1710.89		23.065	60.0035
8.39867	35.902		26.002	120.408		15.7193	90.0177		137.737	1736.79		22.9923	59.8705
8.26127	37.2484		26.146	118.209		15.4386	86.2633		141.921	1707.45		22.9873	59.5323
7.84327	36.5425		25.79	117.495		14.9912	87.868		141.526	1708.05		23.0537	59.575
8.17643	36.3464		25.5207	116.612		15.2368	86.851		139.211	1686.53		22.916	59.8287
7.90187	37.6144		24.8573	113.645		14.9474	88.8247		139.921	1621.87		22.916	60.0142
7.51643	36.3006		25.14	112.955		15.1403	93		141.816	1571.84		23.086	60.4426
6.06547	36.2026		23.065	115.173		14.9737	94.0967		140.316	1508.11		23.1413	60.5957
5.5753	37.9608		24.622	115.408		14.8947	95.0613		137.447	1563.89		23.1327	60.8081
5.32663	37.3856		24.3073	115.397		15	93.0527		141.447	1621.95		23.3437	60.6886
4.2677	36.2549		23.2863	117.688		14.2193	89.2893		136.737	1629.05		23.3167	60.4685
4.1633	34.9216		23.755	117.414		13.6667	88		141.289	1697.29		23.3783	60.3048
3.7188	35.1372		24.8923	119.795		13.886	88.298		142.079	1722.29		23.3967	60.0103
3.3725	35.1111		25.0417	123.435		14.6667	89.9123		141.211	1865.95		23.3917	59.6306
2.15693	33.7909		25.9737	122.992		14.5789	88.8157		142.605	1844.18		23.4213	59.3612
3.11747	34.2483		27.397	121.987		14.6842	88.6667		143.289	1788.71		23.373	59.5316
3.56193	35.8431		27.4337	122.6		14.5526	86.342		138.316	1769.97		23.294	59.5706
3.03913	35.0784		27.5923	124.203		14.2983	84.193		134.737	1710.45		23.265	59.5132
3.2416	35.2614		27.1657	121.93		14.114	83.149		137.158	1588.55		23.076	59.7786
3.8168	34.915		27.264	121.384		13.8947	85.2547		130.526	1504.71		22.9883	60.3572
4.47063	35.2026		27.7273	121.337		13.7719	86.2803		137.237	1506.42		23.036	60.5806
3.71213	35.3268		26.128	121.278		13.9035	85.2017		141.395	1414.87		23.196	60.4751
3.01957	35.2549		25.686	121.561		14.1842	85.3333		135.868	1392.92		23.3013	60.308
2.8497	35.647		24.734	121.233		13.8158	84.7893		136.605	1407.5		23.4847	59.8813
3.26133	33.7778		24.1173	120.225		13.4649	85.2807		134.237	1426		23.5423	59.7926
4.13737	34.4314		25.1053	120.179		13.7193	86.8947		139.132	1557.61		23.691	59.9407
3.8887	35.1307		24.531	116.865		13.6404	86.6753		127.763	1636.66		23.8467	60.3843
4.22213	35.0065		24.5383	115.163		13.9123	85.4823		132.632	1732.39		23.8257	60.5463
3.46417	36.1503		25.2613	116.288		14.3947	85.5523		134.553	1760.08		23.8	60.6376
3.84283	36.0196		26.285	116.073		14.5439	88.9383		141.211	1725.16		23.7997	60.1464
3.39877	35.5163		25.3643	116.778		14.3684	90.3507		136.553	1730.42		23.72	59.6807
3.6078	36.0784		24.0007	117.474		14.307	91.395		142.105	1626.29		23.7173	59.3164
3.81697	36.0588		24.5353	120.291		14.1842	90.6667		145.658	1632.32		23.611	59.0653
4.00007	36.5163		24.5057	122.89		14.2281	87.8507		145.553	1559.55		23.634	59.0572
3.86297	36.268		23.8987	124.229		13.9912	87.0437		136.316	1553.05		23.6017	59.1499
3.77127	36.6209		24.995	123.957		13.7544	86.1933		134.342	1671.87		23.3713	59.6558
3.7517	36.3595		24.6347	125.071		13.4912	88.6493		135.053	1744.18		23.388	60.3149
5.18943	36.5621		25.215	125.76		13.1754	91.8067		137.079	1744.03		23.2197	60.5569
5.7516	36.183		24.1917	126.602		13.4386	93.263		139.105	1751.76		23.3377	60.1568
5.30703	36.8104		24.7253	123.495		13.8947	95.8683		141.947	1785.55		23.416	59.7572
4.6537	37.3987		23.2373	122.975		13.7369	96.93		141.868	1653.58		23.4343	59.3453
4.28777	37.3334		22.8467	120.502		13.807	95.1493		143.579	1564.16		23.3453	58.8835
4.6471	37.6797		23.0363	119.987		13.614	97.377		138.632	1437.03		23.4083	58.6671
5.90847	38.0654		24.9467	119.654		13.3246	97.816		140.211	1491.55		23.306	58.6256
4.94127	37.0784		24.0713	121.099		13.4035	95.7197		146.237	1593.92		23.128	58.7972
5.24177	37.5621		24.3177	120.699		13.1666	91.9033		153.079	1619.45		23.0017	58.6673
5.01957	38.1176		24.4297	121.478		13.7281	88.5267		158.079	1662.26		23.013	58.1688
5.23523	38.0327		26.503	119.229		13.2807	88.263		165.316	1645.32		22.982	57.5636
4.96083	37.098		27.2053	120.513		13.421	88.6843		172.184	1697.18		23.0433	57.557
4.41153	36.3791		26.3057	124.691		13.2368	88.9383		164.5	1642.5		23.065	57.8716
5.0587	37.4967		25.937	125.088		13.1404	88.9737		164.316	1729.05		23.125	58.4165
5.58823	38.8627		26.1827	126.713		13.4123	92.307		160.474	1707.45		23.2217	58.8906
6.1633	39.2615		25.881	127.98		13.9298	93.8687		155.5	1778.42		23.3367	58.9273
6.92837	39.3922		25.301	126.235		13.2807	94.2543		155.947	1661.95		23.2867	58.8243
7.19597	38.6209		26.0123	123.572		13.079	92.4737		152.105	1650.08		23.294	59.1296
7.00657	38.1961		26.6393	120.381		13.1316	88.5437		158.789	1658.05		23.183	59.1512
6.229	37.3137		26.5453	118.644		12.9912	90.4823		163.184	1630.55		23.28	59.4006
6.20903	35.8628		27.4977	118.209		13.7369	92.149		161.289	1628.76		23.2293	59.6509
6.6471	35.2483		25.528	119.423		13.9737	94.4737		160.974	1636.13		23.2397	59.4751
6.0458	36.5752		26.5573	120.694		13.9386	96.0087		168.947	1638.68		23.1693	58.5044
6.0523	35.6993		26.8097	121.981		13.5088	93.7283		175.342	1767.42		23.0777	57.6414
5.67987	37.2222		25.2273	125.424		13.3158	92.9297		175.632	1771.16		23.094	57.1104
6.25493	36.9738		27.1467	127.165		13.3158	91.2633		171.184	1847.89		23.0987	56.7877
6.98713	38.268		26.641	129.263		13.8684	88.8333		170.895	1767.16		23.1637	56.7524
7.3336	38.5163		27.044	129.01		14.5965	90.57		167.289	1661		23.3613	56.8687
7.17633	38.8301		27.4867	127.911		15.1842	91.9913		166.711	1599.84		23.397	57.0292
7.7058	39.4902		26.2763	129.601		14.8859	94.8597		165.526	1510.95		23.397	57.3274
6.9936	41.3399		25.3553	129.8		14.8597	91.9913		170.053	1499.95		23.3883	57.6349
7.27433	40.3333		25.5607	128.707		14.9123	93.7107		174.5	1549.45		23.432	57.7001
7.28753	39.5555		26.9823	129.462		14.7368	95.412		179.105	1528.53		23.3237	57.5971
8.3661	38.9346		26.073	130.05		14.5526	97.114		175.763	1617.87		23.243	57.4938
7.71227	37.4836		26.3047	128.235		14.228	96.9473		176.737	1590.74		23.215	57.3626
7.86267	38.4902		26.4423	126.52		15.0088	95.342		181.421	1614.29		23.1663	57.2318
9.43777	38.915		25.9123	124.616		14.8333	94.9473		192.763	1695.74		23.2433	57.309
10.3987	39.085		26.32	122.991		14.6491	96.342		188.316	1794.13		23.3243	57.3725
10.732	38.2615		25.3033	120.794		14.4298	96.4913		185.263	1857.84		23.4413	57.5881
9.8561	39.4052		26.8393	120.657		14.5526	95.509		195.474	1930.42		23.381	57.5586
8.80377	40.8693		25.728	121.294		14.5614	94.07		197.632	1898.32		23.466	57.3834
10.2025	41.4444		26.0587	123.646		14.8333	94.3073		204.763	1806.29		23.5573	57.7351
10.8038	42.1111		24.6367	124.455		15.3245	94.4037		206.316	1694.16		23.737	58.3349
10.6013	42.0327		24.1547	125.356		15.307	97.1667		200.237	1749.82		23.8377	58.6634
10.7908	42.0523		25.7313	124.276		15.4474	98.7543		203.053	1779.53		23.867	58.9145
11.2939	42.1961		27.5383	123.171		15.3333	102.728		210.526	1760.03		23.848	58.9163
12.6863	42.3464		25.8653	123.811		14.9211	99.728		217.816	1727.37		23.8533	58.8984
11.5557	42.0457		25.1717	124.225		15.5614	102.912		215.211	1707.53		23.8913	58.4866
10.8957	42.7712		25.9453	125.107		15.5965	101.096		217.184	1701.16		23.9877	58.1565
12.1241	42.7516		23.9367	124.359		15.1053	101.377		226.053	1716.95		24.257	57.9391
12.2941	42.8954		24.393	125.367		15.5176	100.439		221.974	1782.24		24.4093	57.9849
13.6863	42.6536		26.161	127.35		16.3596	100.877		230.237	1765.92		24.364	58.2488
14.7451	43.3595		25.2327	128.134		16.0614	97.9297		230.895	1811.08		24.5473	58.5142
14.3204	44.0523		25.6127	125.847		16.0351	96.1313		235.974	1736.84		24.6363	58.9384
14.4575	43.2026		25.8067	125.262		16.2807	94.5877		247.579	1682.5		24.595	59.2621
15.3464	44.2484		25.327	123.927		16.0877	96.5263		251.789	1656.66		24.638	59.3365
16.1108	44.2614		23.749	123.725		16.079	96.6753		258.921	1692.84		24.864	59.5375
16.5164	44.7582		23.8393	122.836		16.4386	96.851		271.684	1800.21		24.9803	59.9068
16.6076	44.1634		25.1443	125.034		16.8158	96.044		263	1846.87		25.021	60.7038
15.4773	42.8039		25.3577	125.51		17.7018	96.965		256.553	1949.39		25.2813	60.7502
17.2547	42.2614		26.1943	125.704		18.9123	100.789		269.105	2092.66		25.569	60.9612
17.1308	41.9935		25.451	126.937		19.4737	101.325		279.184	2111.87		25.815	61.2635
17.6666	43.2353		25.781	126.513		19.6667	98.7103		279.368	2176.05		25.955	61.617
18.3596	43.7386		24.7303	124.745		19.6228	97.5177		289.132	2101.66		26.165	62.0708
19.0459	43.8889		24.004	124.11		19.6316	99.3947		299.658	2038.34		26.37	62.2603
18.8171	44.098		24.5097	125.921		20.5526	98.7983		298.868	1801.71		26.5113	62.2511
19.8168	44.6601		24.821	124.193		21.386	98.5177		302.026	1666.39		26.7533	62.3325
19.0391	46.1242		24.8453	125.058		21.2017	94.9827		316.947	1617.74		26.9237	62.8639
21.0851	46.9869		24.8243	125.694		21.3333	93.2193		330.579	1562.47		27.1953	63.6853
21.5556	46.0523		24.7147	126.644		21.9912	92.2983		334.026	1591.42		27.562	64.4168
21.6734	47.7582		25.2777	126.082		22.9649	91.281		333.289	1647.74		27.8237	64.9724
23.039	47.3464		24.992	125.366		23.1842	93.0087		340.921	1746.08		28.3127	65.6565
24.4573	48.2288		26.1367	123.494		23.7632	96.4473		340.158	1765.37		28.4487	66.2802
24.7777	48.1699		27.717	123.63		24.6842	95.4913		355.605	1858.37		28.619	66.9849
24.9868	47.7582		25.6037	127.393		24.8333	95.3247		359.474	1846.42		29.063	67.7425
25.3531	49.5621		26.5397	127.973		25.7281	96.307		367.447	1983.11		29.4297	68.3563
25.3922	49.2549		27.1293	130.821		26.9298	97.386		374.132	2032.11		29.9437	68.8855
26.1308	49.8366		28.7467	130.899		27.114	95.7457		394.763	2005.47		30.4577	69.4578
26.4508	51.3791		29.4023	129.83		27.1228	89.9913		418.132	1935.97		30.8033	69.7954
26.5295	49.7582		29.4897	127.456		28.0351	88.0963		422.105	1837.29		31.188	70.1998
28.3723	48.4183		30.786	128.133		30.1228	90		411.921	1732.74		31.6737	70.9891
29.5817	49.6601		29.888	125.556		31.3333	91.7717		431.868	1720.95		32.161	71.7737
30.3595	48.7712		31.1357	124.171		32.7632	90.2547		451.053	1707.45		32.732	72.6805
31.2026	49.1111		31.0697	124.464		32.9649	88.8687		484.5	1706.53		33.2077	73.2627
33.6341	49.6993		32.0803	122.296		33.9123	85.36		497.895	1699.34		33.7883	73.831
34.7973	49.8301		31.8423	121.654		35.193	81.5703		503.947	1718.32		34.3587	74.7494
35.5294	49.2157		33.7323	120.883		37.0702	79.0963		507.658	1711.47		34.8463	75.2867
35.8104	49.7908		34.3693	121.678		38.386	77.807		529.342	1651.84		35.374	75.7483
36.9998	50.3922		33.3877	122.919		39.3597	77.263		527.474	1673.5		36.0857	76.2919
37.6211	52.6667		35.334	124.009		41.5614	78.2983		554	1677.21		36.928	76.8231
40.0719	53.6928		36.6923	127.599		42.7895	77.579		571.395	1739.61		37.6393	77.1805
40.4119	55.0261		37.8263	127.277		44.1316	74.921		591.921	1733.58		38.2757	77.6228
40.4512	56.4314		38.7427	127.637		45.4737	72.6493		615.395	1766.08		38.7683	78.8208
42.6469	55.8823		40.663	127.087		47.6228	72.649		619.579	1783.84		39.327	80.0436
45.3987	56.268		41.433	124.919		49.3684	72.2543		625.421	1847.97		39.8527	81.014
43.6799	56.5359		42.4097	126.961		52.614	70.1757		640.342	1822.29		40.5987	81.5221
45.3399	56.3137		42.729	123.921		55.2456	65.3597		656.053	1845.53		41.4463	82.2409
47.3791	53.9412		44.514	123.038		55.8596	62.9827		681.132	1780.79		42.448	83.3954
46.3987	52.8954		44.303	125.814		56.8421	61		696.342	1730.21		43.2473	84.6936
46.9215	53.5686		46.466	127.835		59.8509	58.737		696.395	1642.79		44.1823	85.8637
49.2679	53.6863		48.0537	128.85		60.8246	56.3333		699.974	1588.61		45.0733	86.9626
50.1176	53.9085		49.304	129.514		61.2281	52.8333		719.237	1539.08		46.177	88.1401
51.7191	53.3007		48.5583	129.025		63.0789	50.0177		732.105	1466.47		47.022	89.153
53.771	55.3006		50.8603	125.339		67.0175	49.702		728.895	1431.79		47.88	89.2022
55.5817	55.549		52.595	124.547		70.1053	47.4737		710.842	1424.18		48.7593	89.2268
56.8104	55.6732		54.8417	122.217		72.114	45.9473		711.026	1339.29		49.629	89.034
60.5164	55.817		55.1847	119.247		74.7456	44.4913		717.026	1378.26		50.4743	89.1027
61.9803	55.7908		57.515	118.472		75.0965	40.237		717.053	1410.37		51.3357	89.2262
63.7453	56.2876		59.868	119.026		75.886	36.272		705.921	1400.74		52.363	89.8517
63.9281	54.5229		62.4293	120.113		76.4737	32.1927		717.053	1399.47		53.6437	90.6483
63.4381	55.7909		63.7813	120.1		79.114	29.228		712	1397.11		55.0097	91.3113
64.2418	55.2222		65.782	117.485		80.3772	26.193		692.316	1349.95		56.144	92.2849
65.255	54.8954		67.776	113.812		79.0877	22.7633		669.895	1342.74		57.4787	93.0309
67.5622	55.5032		69.8313	114.015		79.1404	21.4123		633.684	1269.5		58.758	93.9323
70.3136	55.0588		69.9067	113.97		79.3772	20.693		606.211	1264.13		60.0247	94.7196
69.1896	54.4902		71.0097	113.246		79.5176	18.5877		571.447	1270		61.6557	95.3991
70.4378	54.3333		71.588	112.498		78.1754	16.956		521.842	1258.18		63.2007	96.6078
70.8368	55.1242		72.9063	113.936		74.1491	14.4737		472.5	1192.97		64.53	97.8655
71.9609	55.2026		76.4557	116.227		71.9298	10.6317		400.342	1161.24		65.9883	99.8844
74.9149	57.1699		80.237	111.931		68.6754	7.68433		353.158	1115.68		67.79	101.925
76.5948	55.2157		83.4123	110.024		64.6404	7.02633		306.079	1079.89		69.5583	103.396
78.6667	54.8236		88.685	103.844		60.5877	6.114		272.237	1077.39		71.0007	104.517
79.8171	53.7647		89.8493	102.991		55.6755	4.16667		256.895	1025.82		72.515	105.204
80.477	52.2419		91.6993	104.832		51.2719	3.44733		241.368	949.079		74.4393	105.326
79.6994	52.2353		89.7587	105.874		48.1228	3.13167		247.132	860.237		76.5313	105.696
81.7713	53.098		89.1753	104.651		45.9825	2.33333		247.026	721.789		78.7697	106.439
84.8238	52.451		93.1023	104.914		42.9912	1.588		257.395	549.684		81.135	107.35
85.9347	52.2157		95.3703	104.909		40.1754	1.37733		257.474	451.263		83.6547	108.406
86.1242	52.7909		99.223	102.911		36.5789	1.5		263.5	368.553		85.858	109.324
86.392	53.3987		102.932	103.034		33.7719	2.21933		277.579	319.132		88.676	110.252
89.5426	52.8823		105.309	99.935		31.5	2.00867		274.737	279.868		91.617	110.842
91.5946	52.8105		107.885	101.27		29.8597	0.894667		276.5	225.632		94.2187	111.414
92.9151	51.1503		111.34	99.0643		28.5526	0.868333		270.737	215.5		96.8353	112.149
93.7515	50.0981		112.662	96.6757		28.5526	0.938667		255.658	223.553		99.6443	112.591
97.0063	50.9673		113.554	95.9147		28.7544	1.43867		244.868	239.447		101.944	112.941
99.3593	51		113.307	94.5547		28.5965	1.02633		244.237	224.658		105.337	113.146
99.503	49.8889		117.223	91.6803		27.6842	1.78067		246.895	217.711		109.909	113.328
99.2027	49.549		119.749	88.2053		28.3158	2.23667		242.711	253.421		114.803	112.828
102.667	48.2157		121.361	87.941		29.0877	1.78067		232.053	277.921		119.625	112.611
103.516	46.5621		124.405	87.0657		29.772	1.43		236.921	253.132		124.173	112.403
101.34	46.5359		125.891	88.3727		30.7018	1.886		233.5	263.026		128.779	111.879
103.007	46.2941		127.411	88.5873		31.1316	1.07		225.316	252.395		132.88	110.818
101.876	47.1765		131.189	88.1683		31.3421	1.01767		229.895	265.474		136.795	109.269
101.183	46.3334		135.171	86.4813		31	0.684		231.342	290.158		141.018	107.354
99.0653	43.4967		136.952	84.933		31	0.394667		223.816	287.553		144.776	105.063
97.451	42.4575		136.479	80.0183		30.7105	0.447333		236.868	273.368		148.805	103.279
97.575	42.5294		138.429	76.371		31.1667	1.19267		242	307.816		152.388	101.572
96.4509	42.7451		139.795	74.0593		31.0789	1.98267		249.053	391.816		155.494	99.3778
91.7514	40.8954		140.386	72.295		30.5877	1.51767		254.184	378.842		157.293	96.8173
87.4641	40.7778		139.87	70.0353		30.8245	1.92067		256.658	463.237		158.831	94.3457
82.1765	41.8366		143.959	67.8843		31.921	1.88633		262.237	484.263		159.762	91.9466
77.0717	40.5686		148.34	67.723		33.9211	0.737		261.763	489.526		160.343	89.3541
73.9347	38.5817		150.465	65.0193		33.9737	0.886		267.868	482.263		160.272	87.2137
67.5816	36.7908		152.195	64.093		34.4913	1.01767		271.026	467.684		159.225	84.9026
62.1962	36.5817		154.907	62.451		35.2719	2.66667		274	396.079		157.525	82.6138
58.6209	34.6863		154.205	60.4783		36.3947	3.06133		267.474	366.605		154.395	80.1113
55.3462	32.8693		157.276	60.0067		37.6404	3.342		276.447	326.289		150.548	77.6638
50.1764	31.9673		159.223	57.4527		38.4649	3.28967		280.421	290.947		146.485	75.3308
46.8822	31.1438		158.926	57.202		38.6053	3.421		284.079	312.237		141.681	72.5059
43.647	31.1307		159.859	55.5107		37.7544	2.75433		270.632	340.605		135.884	69.4444
39.6402	29.5947		161.03	55.2887		37.9298	2.28967		273.053	363.368		128.667	66.3399
36.8822	29.9216		159.034	54.4147		36.1228	1.535		278.868	425.316		120.118	63.7059
33.4118	29.9804		154.921	54.1153		34.5965	1.44733		297.184	389.5		111.054	61.7908
31.3924	29.902		151.759	55.466		33.5439	0.675333		309.789	359.842		102.513	59.6227
30.6731	30.098		148.588	54.0303		33.1667	0.596333		315.342	375.184		94.4193	57.4656
28.6013	28.6079		140.951	51.601		32.307	1.16667		313.632	370.237		87.8933	55.7451
27.5425	27.7843		135.963	50.643		31.0439	-0.631667		309.553	398.789		82.0453	54.3874
25.9999	27.6928		127.338	49.7427		30.0175	0.473667		289	381.132		76.504	53.2055
25.2482	27.902		120.286	48.8283		27.8334	0.754667		279.447	376.395		71.9683	51.7917
23.6079	26.719		109.63	47.9087		26.9211	1.27167		271.421	364.105		68.0317	50.5774
21.9804	27.3007		100.791	47.7977		26.2983	1.32467		263.132	353		64.6277	49.3951
19.7584	27.1569		87.919	45.6483		25.3947	1.43		250.158	346.132		61.8	48.4767
17.6668	27.8301		79.277	45.0503		24.4825	1.307		242.474	358.868		59.1953	47.8239
17.6276	26.5163		69.085	45.2867		23.4737	1.40367		236.263	397.211		56.714	47.6377
16.6274	25.4837		59.9867	43.8927		22.9825	1.28067		241.395	353.158		54.524	46.9899
16.8627	25.6536		55.9347	42.9367		22.114	2.16667		244.868	380.395		52.671	46.6382
18.0718	26.5294		50.8353	41.7947		21.6491	2.40333		251.632	435.342		51.396	46.5157
18.3333	24.5098		46.3423	39.911		21.5526	2.86833		254.263	407.079		50.2663	46.5449
20.673	25.549		42.2803	40.117		21.1667	1.78067		251.237	417.632		49.3063	46.629
20.6666	25.0588		39.087	38.5933		21.6491	1.23667		250.053	414.079		48.3827	46.6044
21.1762	24.8823		36.9577	37.0873		22.3772	1.623		235.184	418.711		47.5843	46.5461
21.4708	25.5294		35.017	38.401		22.9299	1.50867		223.026	409.789		46.9383	46.3864
19.5489	26.1242		33.613	37.9187		22.8158	1.54367		223.447	366.053		46.7923	46.5591
20.2219	26.085		33.081	37.5153		22.114	1.23667		225.684	380.158		46.962	46.9059
21.353	25.732		32.3533	37.717		22.3509	0.640333		226.632	391.5		47.1333	46.8596
20.7255	24.9412		31.5237	36.5723		23.6579	0.298333		226.842	351.395		47.2443	46.7803
19.8168	25.0196		31.8763	34.866		24.693	0.394667		240.868	327.763		47.5773	46.9618
20.1894	25.6994		31.9683	35.002		25.6491	0.903667		244.211	327.816		47.9723	46.9392
20.536	24.1895		31.2607	34.4737		26.693	0.886333		261.553	345.421		48.1443	47.0395
20.3138	24.6732		32.1373	33.112		26.7719	1.43867		273.842	405.421		48.481	47.3676
21.0914	23.3072		34.2183	32.4773		26.5965	1.149		277.789	437.105		49.0647	47.4748
22.0459	24.3203		34.8823	32.9167		26.2719	0.447333		267.132	469.658		49.5457	47.5186
21.0719	24.2484		34.9947	32.744		26.9737	0.947667		259.158	517.158		50.2993	47.449
19.3401	23.1111		34.5667	32.628		26.8772	0.500333		262.132	496.816		50.9783	46.9897
18.9544	22.3987		33.8283	32.4367		26.6316	0.149333		264.421	463.763		51.8067	46.7551
19.2093	21.9346		34.6547	32.7067		26.4211	0.693		255.237	425.789		52.78	46.6882
18.2681	22.1699		35.2	33.2037		26.4035	1.237		262.868	405.316		53.6213	46.8117
17.1634	21.9477		35.6543	32.911		26.2719	2.08767		261.053	420.184		54.28	47.1761
17.2353	23.183		35.5627	32.7		25.886	2.20167		268.368	393.474		55.0237	47.4056
18.4967	21.8758		35.72	32.3003		24.6754	1.82467		264.816	437.605		55.876	47.5032
17.0066	21.7124		37.2463	32.9793		24.1053	0.886		257.684	478.605		56.9597	47.6413
17.4446	22.719		37.789	32.425		24.1579	0.675333		250.132	486.921		58.005	47.9148
17.9479	22.2026		36.675	33.1683		25.1491	1.728		256.053	389.526		59.0923	48.0929
17.1502	21.5294		37.482	33.652		25.1491	3.377		254.789	380.789		60.103	48.5021
17.1308	21.9412		37.779	33.9377		24.4123	2.20167		250.553	398.684		61.1557	48.9759
16.8957	22.0915		38.617	33.3237		23.693	2.272		252.684	361.053		61.8643	48.9689
17.2354	21.3987		39.4457	33.5447		23.2105	1.71033		253.579	364.526		62.651	49.046
17.3858	21.5621		40.3973	33.708		23.5614	1.05267		253.763	320.553		63.209	48.939
17.1503	22.6275		41.5667	33.7637		23.7193	1.97367		244.395	318.447		63.8543	48.7364
16.9478	22.2287		42.878	32.687		24.6842	1.70167		252.605	347.658		64.499	48.5807
17.4118	21.9542		44.084	32.6927		24.7456	2.39467		252.474	300.079		65.481	48.7339
17.4382	21.9608		44.4867	32.563		24.4737	1.49967		258.132	250.868		66.4767	48.4158
17.536	21.9216		44.979	33.0327		23.8772	0.877333		268.789	253.658		67.859	48.3473
17.719	21.9673		47.478	33.914		23.4211	1.09667		272.842	270.789		68.9483	48.3731
17.2614	21.1699		49.192	34.2127		22.5526	0.640333		284.526	313.237		69.5757	48.3118
17.4705	22.6536		51.3377	33.1727		22.0614	0.719		271.053	278.737		69.9187	48.2336
17.4769	23.1699		52.3727	33.1733		22.1052	0.807		260.579	277.895		69.8153	48.0517
16.8564	22.9085		52.2357	33.7153		21.6667	0.421		249.711	315.053		69.3603	47.7859
18.4182	21.6209		51.8263	33.523		21.386	0.0786667		244.816	303.184		68.8313	47.575
17.8495	20.9085		50.5177	33.1903		21.7719	0.009		235.184	262.526		67.8767	47.426
18.1766	21.634		50.6137	33.669		22.4035	0.43		229.395	266.658		66.6663	47.1985
20.7256	22.1307		49.7653	33.99		23.5965	0.263333		221.605	214.789		65.6397	47.2263
19.8561	20.9739		49.8017	33.113		24.6316	1.05267		221.053	217.105		64.9003	47.5181
19.5749	21.5948		49.0267	33.5873		24.5263	0.86		220.789	233.184		64.6393	47.4969
19.5882	22.0719		47.7523	32.751		24.079	0.605333		220.816	241.395		64.4413	47.1862
20.4248	22.4641		47.9647	32.0473		23.7632	0.701667		220.211	237.789		64.33	46.9982
21.2418	24.0065		47.01	33.8183		23.3947	0.877333		221.368	223		63.856	46.7373
23.0718	23.8889		46.1037	34.467		23.6842	1.105		218.921	251.105		63.318	46.8775
22.0915	22.8105		43.693	34.9683		23.3158	1.28067		215.184	259.605		62.618	47.5496
23.8954	23.1111		42.807	35.4107		23.6754	1.228		223.132	230		62.2477	48.0975
25.9477	23.3399		41.402	35.0987		24.4386	0.789333		221.079	311.553		61.961	48.7126
27.1506	23.1568		41.6407	33.2087		24.1491	1.351		216.211	303		61.527	48.9629
29.1046	22.2876		42.417	33.3873		24.5	1.83333		217.158	296.026		61.8113	49.2336
29.2483	23.085		42.5177	33.0167		23.6754	1.535		214.421	244		62.1187	49.4742
28.4705	22.9085		42.418	33.7063		23.4737	2.06133		218.368	226.132		62.514	49.8758
29.1113	22.7647		41.6113	34.5107		22.7281	2.842		226.026	267.632		62.939	50.2224
29.5357	21.4902		41.687	33.6017		22.0702	1.886		223.895	257.237		64.1157	50.7415
30.4643	22.4837		40.9957	33.9117		21.5614	1.842		222.316	241.105		65.1357	51.3582
30.9935	22.4052		40.1807	34.7333		21.3859	1.79867		217.711	239.763		66.5843	51.9691
31.1244	22.6405		39.5333	34.2117		21.579	1.96467		226	247.658		67.8927	52.169
30.6014	22.817		39.536	33.1377		21.1403	1.93867		226.947	231		69.3007	52.2761
30.4444	22.7647		39.259	31.1957		21.4825	1.81567		228.447	266.579		70.114	52.1712
32.3137	21.9804		38.447	31.2243		22.0965	2.044		229.737	271.132		70.587	51.9282
33.2615	23.9608		39.557	31.581		22.2544	2.25467		228.263	270.184		70.5847	51.5177
32.9019	22.085		38.4753	32.647		22.4123	2.702		226.711	299.342		70.5333	51.4802
33.7125	22.2157		39.2363	33.1517		22.0526	2.20167		227.342	287.368		70.5713	51.4267
34.1963	21.6144		40.585	32.964		22.3597	2.658		244.632	287.947		70.048	51.6542
34.6733	21.6144		40.7733	32.85		22.807	1.71067		250.553	293.737		68.9713	51.7734
33.6796	21.6536		40.779	33.7743		22.4123	1.05233		251.921	324.921		67.6107	51.4306
33.7846	21.6536		41.477	33.55		21.7719	1.123		254.421	302.447		66.1707	51.294
32.1959	21.366		39.5903	31.5597		22.1316	1.158		261.237	286.263		64.6617	50.8608
31.0392	21.6797		38.6117	31.6573		21.9561	1.386		258.132	283.316		63.022	50.5681
30.7516	21.7255		38.7543	31.6787		21.7369	1.39467		261.711	280.026		61.5293	50.4832
29.9805	22.2484		37.6433	33.3947		21.7105	2.17533		269.763	277.474		59.819	50.2786
29.3658	21.647		38.1017	32.6763		22	2.044		276.553	269.605		58.5353	49.8407
29.5749	22.3399		39.252	32.6573		22.3421	1.33333		274.605	294.263		57.7407	49.451
28.8955	22.6797		37.5667	33.0937		22.9298	1.44733		267.211	260		57.197	49.4174
26.8955	23.3268		35.6173	31.798		22.8596	1.64033		272.289	229.447		57.1347	49.3514
25.2419	22.5817		35.8797	31.433		21.9473	1.43867		283.158	235.026		57.3557	49.0546
23.8429	21.9019		35.3323	32.4767		21.7632	1.74567		288.237	235.842		57.4743	48.8546
24.0262	22.0588		35.1583	32.151		21.2982	0.684333		282.5	281.789		57.49	48.6912
23.7972	22.0654		32.84	32.1113		21.4474	0.544		270.842	306.789		57.9767	48.8012
21.7972	22.5752		33.0413	31.6647		20.7456	0.675333		272.526	394.526		58.5083	48.7623
20.4835	21.6863		33.363	31.1727		19.9561	0.517667		272.763	407.474		58.673	48.7351
19.1436	21.732		33.7203	32.7617		20.2105	0.815667		266.895	385.105		58.9417	48.8417
18.0394	20.5882		35.008	33.8427		19.6316	1.272		279.684	403.921		59.3323	48.6589
17.5295	19.9281		35.0337	33.0497		19.9035	1.66667		288.5	334.474		59.75	48.7148
17.6015	19.3137		35.1667	32.9393		20.7106	1.92967		300.474	303.974		60.1727	48.6289
17.7648	19.8889		35.5847	31.9303		20.2368	0.710667		306.053	282.395		60.72	48.7023
18.523	20.3726		35.793	31.798		20.0175	1.08767		300.921	267.184		61.5257	48.9678
18.3333	20.6666		35.9917	32.0227		19.7105	0.465		311.421	291.342		62.3833	49.2065
18.2417	19.9412		35.771	32.5103		19.5614	0.377		313.342	297.816		62.9653	49.2066
18.8821	21.1634		36.358	32.8367		19.6316	1.00033		300.395	256.368		63.4383	48.8558
19.5292	21.1503		37.4997	33.1767		19.6579	0.999667		303.079	265.421		63.878	48.391
19.2156	21.0915		37.8457	33.3483		18.9737	1.85967		299.868	261		64.3903	48.1199
18.9934	20.7908		35.9437	32.51		19.5351	2.035		292	222.947		64.809	48.1073
16.7517	20.3399		35.1193	32.052		19.2895	1.544		300.421	216.763		64.7033	48.2718
16.987	19.6536		35.1143	32.687		19.7456	0.035		290.053	220.711		64.775	48.5281
16.9414	19.6013		33.7493	32.1507		19.5439	1.544		289.474	219		64.9357	48.7714
16.7124	19.9739		31.4223	32.2893		19.8509	1.079		298.053	214.605		65.282	48.8143
17.2223	20.268		32.062	33.0847		19.4825	1.17533		304.316	221.526		65.497	49.0344
17.4642	20.0458		31.7167	31.7703		20.1755	0.771667		301.053	209.132		65.538	49.1382
16.6666	19.9019		31.2863	31.7633		19.4824	0.131333		303.211	236.211		65.8803	49.2417
15.2614	20.2418		29.9577	30.8373		19.1491	1.053		306.553	279.316		66.143	49.2609
14.3463	20.1503		28.7517	31.6883		18.9386	1.25433		313.421	299.579		66.3717	49.2727
14.595	20.1699		28.29	31.76		18.7456	0.236667		315.684	307.947		65.884	48.7925
13.9476	20.732		27.474	32.6263		18.6052	0.166667		308.553	260.737		65.7567	48.4486
14.1698	21.1046		27.2917	31.9313		18.5614	0.000333333		297.895	214.342		65.6483	48.4777
15.209	19.1699		27.068	32.6597		18.4825	0.377		294.132	203		65.704	48.6416
14.3788	19.451		26.5367	31.5693		18.5	0.675667		293.211	191.053		66.2173	49.196
14.0916	19.9216		26.3377	30.6243		18.1228	1.009		299.079	205.395		66.9903	49.6119
13.5882	20.2549		24.7617	30.1923		18.2017	0.377		291.684	180.789		67.3563	50.0519
13.8957	19.8301		22.6153	29.484		18.6141	0.737		307.237	196.947		67.752	50.3187
14.0001	19.1895		22.582	29.4833		18.3509	0.0616667		316.289	136.026		68.3193	50.736
14.634	18.4706		22.3493	29.187		18.1316	0		310.237	131.474		68.7993	51.333
14.8364	19.0261		21.692	28.8463		17.7982	0.0966667		326.105	186.079		69.6303	51.5083
14.4511	19.4771		22.0377	28.2967		17.6053	-0.596667		320.289	245.816		70.1757	51.8493
15.0261	19.353		20.8577	28.7003		17.5263	-1.05233		323.5	189.632		70.8383	52.1931
14.7778	20.1307		20.6087	29.0093		17.5702	-1.167		325.447	177.632		71.1377	52.3337
14.4181	20.5294		21.3	29.0733		17.0614	-1.193		316.605	203.868		71.217	52.5965
14.6078	18.9542		21.3793	28.6077		16.9561	-0.254333		316.316	187.211		71.4293	52.7656
13.9282	20.3137		20.605	29.0027		17.4298	-0.763		310.395	208.5		71.494	52.8894
13.1701	20.7059		18.6233	29.3837		17.5088	-0.57		300.105	251.395		71.4793	52.9965
11.9213	20.4706		17.4443	28.8033		17.8947	-1		294.658	243.868		71.131	53.0508
13.2744	20.8954		17.8367	29.0567		17.8772	-0.666667		297.763	237.711		70.9393	53.4639
13.464	20.8039		18.2483	29.2157		17.886	-1.11367		307.763	257.184		70.8247	54.0867
12.6076	20.8758		19.2957	28.209		17.5702	-0.947333		307	227.947		70.747	54.418
13.1829	21.6667		18.085	27.5003		18.0263	-1.623		305.421	202.105		70.577	54.5094
12.915	20.9346		18.093	28.2937		17.6052	-1.754		304.158	171.5		70.5257	54.5918
11.8823	21.0131		19.5283	28.293		17.8509	-2.66667		309.763	190.158		70.5677	54.6326
11.32	21.3987		21.1887	28.0877		17.5351	-2.351		314.763	166.658		70.5273	54.2212
10.2548	21.3464		21.9737	27.5713		17.5088	-1.491		321.842	160.763		70.0773	54.0209
9.53597	21.6144		20.9977	27.9953		17.9825	-2.21933		300.763	171.737		69.4223	53.7258
9.9739	21.5556		19.45	28.411		18.0263	-1.49133		310.816	155.895		68.7773	53.1686
10.3399	22.3726		19.6317	27.8923		18.3158	-0.964667		304.026	162.447		68.2963	53.0451
11.5621	21.0523		19.6133	27.1273		18.2456	-1.307		296.789	142.263		68.0853	52.7865
11.4444	21.2876		19.6657	27.4603		18.2544	-1.92133		291.421	197.342		67.961	52.2746
11.0717	22.2418		20.4933	27.2107		18.8158	-2.377		282.026	207.921		67.9233	51.981
10.8169	21.9869		21.285	27.1187		18.2807	-1.87733		290.605	197.737		67.9367	51.6248
11.9476	22.0915		21.083	27.0827		18.7807	-2.78967		300.342	191.842		67.8783	51.4804
12.1372	22.4706		20.444	27.4673		18.5614	-1.88567		302.079	206.211		67.9487	51.3735
12.6276	22.1242		20.2963	28.3023		19.0614	-2.00033		305.053	222.579		68.103	51.4383
13.209	22.098		21.522	27.2247		19.3684	-1.43		300.132	228.632		68.0713	51.3173
12.5032	22.7843		20.688	26.4117		19.1754	-1.728		314.447	204.421		67.9243	50.9426
12.7713	21.3268		19.6623	26.998		19.386	-1.85133		315.342	199.158		68.0607	50.8249
13.9543	22.7255		18.5097	27.352		19.0088	-2.623		313.711	215.132		68.176	50.3432
12.3204	22.6536		18.638	25.6403		19.1316	-2.921		307.342	208.184		68.429	49.9714
12.294	21.085		18.8897	25.6283		18.5351	-2.94733		300.421	188.868		68.7853	49.4561
12.9084	21.0392		17.9363	25.8647		18.8947	-3.48267		295.132	160.553		69.2287	49.3879
12.4835	21.2484		18.516	26.536		18.7719	-3.658		297.842	150.605		69.6157	49.2585
12.8234	21.0392		18.0733	26.7323		19.7807	-3.44733		317.132	180.079		70.0737	49.2931
12.5685	21.6863		18.394	26.3857		20.3333	-2.842		300.237	230.079		70.5517	49.3947
12.5881	21.5882		20.158	26.9607		20.5965	-2.50033		295.763	265.816		70.9543	49.7864
13.0785	21.8562		20.489	26.5787		20.7719	-2.605		297.816	271.737		71.4457	50.0247
13.6275	22.183		19.5183	27.1377		21.3158	-2.456		294.737	258.684		71.8667	50.0587
14.9477	22.3268		19.378	27.1423		21.307	-1.94767		293.132	231.237		72.2543	50.1307
15.1637	21.4837		20.425	27.6537		20.9211	-2.351		287.947	223.421		72.4937	49.6732
15.196	21.3399		20.976	27.9523		20.9825	-3.044		280.342	230.921		72.9953	49.6281
16.2745	21.732		19.9563	27.6763		20.9737	-3.81567		285.921	227.974		73.4363	49.9106
15.3203	22.0784		19.2507	26.6473		20.9825	-3.48233		288.579	213.105		73.721	50.1983
16.3398	22.4183		18.9523	28.07		20.9298	-3.614		277.421	224.316		73.789	50.0856
18.3921	22.6079		19.2293	27.7997		20.4299	-3.95633		272.368	223.526		73.9707	50.0571
18.209	21.7255		17.786	27.718		21.1667	-3.67567		267.658	220.5		74.096	49.8899
18.8105	21.1046		16.9343	27.8617		21.7544	-3.03533		280.974	233.974		74.5407	49.9395
19.8365	20.2353		17.138	27.1447		22.4386	-3.02633		275.079	252.316		74.5953	50.129
19.2223	21.6536		16.387	28.808		23.6579	-2.81567		269.842	239.711		74.4643	50.4082
17.3724	21.6667		16.787	28.9767		24.1228	-2.053		266.474	253.737		74.634	50.5504
18.804	21.6274		17.155	27.991		23.8772	-2.54367		264.132	247.763		74.8027	50.9254
19.6602	21.915		16.4517	28.6133		23.579	-2.851		265.184	258.632		74.8133	51.0627
19.8693	22.3791		15.9423	28.3033		23.2456	-3.38567		270.395	235.184		74.2807	51.3552
20.8826	21.817		16.6933	26.6817		22.8333	-3.79833		280.079	246.316		73.57	51.2117
21.7321	21.6079		17.649	27.688		22.3597	-4.51767		263.632	221.211		72.9237	51.3585
20.693	22.915		16.8797	27.368		22.5526	-5.68433		263.079	234.263		72.7663	51.2383
21.4052	22.8758		17.8057	27.825		23.3245	-5.33333		260.447	235.605		72.8113	51.095
20.3855	22.2287		17.795	27.7137		23.5088	-3.649		263.184	246.789		72.6637	50.9841
20.4902	22.0392		17.6427	28.3263		23.4649	-3.99133		268.342	278.368		71.7653	50.9317
21.0394	22.6144		18.173	27.5233		23.2982	-4.29833		267.526	300.789		70.846	51.2634
20.0787	21.451		18.1917	27.509		23.2632	-5.21967		258.789	293.421		70.011	51.6737
20.1568	22.0261		17.133	27.9627		22.7456	-5.65767		259.421	284.368		69.4057	51.8724
19.8695	22.353		17.4857	28.168		22.1403	-6.149		250.342	287.895		68.6897	51.8752
19.9348	21.9346		16.9953	27.8417		22.307	-7.01767		251.079	269.053		68.4177	51.892
19.6535	23.085		17.307	27.6837		22.3246	-6.41233		258.868	238.474		68.2863	51.7599
18.5622	23.2614		18.036	28.221					256.632	287.632		68.0103	51.5872
19.5684	23		18.0443	27.6967					260.947	268.474		67.6523	51.3755
19.3532	23.1373		18.0193	28.019					281.921	257.395		67.0977	51.5702
19.6275	23.085		18.5563	28.5363					276.026	255.421		66.4343	51.4847
19.477	22.6863		19.2987	28.2017					281.842	221.605		65.9723	51.0983
20.8626	22.2941		18.4167	28.0713					272.579	251.474		65.5747	50.2802
20.1044	22.7386		18.937	28.6363					275.579	269.579		65.024	49.7003
18.4639	22.1438		18.93	28.2353					278.026	244.868		64.5867	49.3008
19.6535	22.3791		18.939	26.985					279.684	231.158		63.8687	49.3613
18.6602	22.0327		19.2217	27.2307					285.974	199.5		62.93	49.0425
16.7386	21.7059		19.0537	27.806					281.842	241.684		62.1237	48.5628
15.451	22.4444		17.5587	27.2573					288.789	223.026		61.221	48.1927
17.0196	22.9673		16.7817	27.266					291.763	261.895		59.9703	48.2726
16.4902	22.4575		17.2197	28.1387					307.553	241.289		58.7903	48.1388
16.1373	22.6471		17.207	28.1063					338.421	187.684		57.41	48.0434
15.5162	22.1242		16.1413	26.7223					343.947	200.132		56.0443	48.052
16.8171	21.8301		15.3197	26.267					339.553	204.842		54.4937	48.0061
17.562	21.4183		15.272	27.072					325.816	219.921		53.514	48.0249
19.0655	21.4118		13.6103	27.3927					323.737	182.211		52.7247	47.7842
19.5687	21.8693		14.1333	27.028					319.947	195.289		52.207	47.3413
17.1568	22.1504		14.982	26.7177					321.263	208.526		51.97	46.8985
16.693	21.0392		15.3867	26.9413					331.579	214.316		51.7483	46.581
14.8563	22.2026		15.9743	27.5573					336.842	205.842		51.412	46.3461
14.8497	22.4183		14.618	27.5997					334.289	217.184		51.1713	46.5514
14.8758	22.0261		14.474	27.1467					334.289	230.921		51.0193	46.8365
14.1831	22.1895		13.884	26.6333					339.974	236.5		50.7303	46.8231
13.5684	22.3203		14.0353	26.2983					342.158	260.395		50.27	46.8951
12.2743	22.4183		13.0943	26.868					349	277.684		49.6743	46.6355
11.9281	22.7713		13.421	27.6107					350.632	284.079		48.9983	46.5991
10.8891	22.1373		13.9823	28.0783					346.605	248.895		48.1023	46.6234
11.0916	22.634		13.233	26.3937					353.368	232.053		47.5207	46.8749
11.5489	22.6405		13.294	25.7807					356.974	216.342		47.0863	47.1201
11.8957	21.085		13.7987	25.7027					347.789	222		46.6573	47.09
12.8235	20.6209		13.1557	25.8217					344.237	209.316		46.5313	47.1908
13.9021	21.5163		12.5597	26.1337					349.947	217.5		46.6853	47.6594
14.2876	21.1699		11.4407	25.7397					349.921	196.474		46.7017	47.8529
14.9608	21.4706		11.231	25.8553					340.789	230.579		46.3507	48.1261
									350.289	205.658		46.1027	48.1265
									350.816	206.368		46.0723	48.1359
									346.842	228.789		45.94	47.9485
									339.5	259.632		45.9077	47.7003
									337.737	227.079		45.7397	48.0618
									331.289	274.263		45.7487	48.0057
									336.553	270.684		45.595	47.9333
									322.658	287.789		45.333	48.2883
									298.895	290.684		45.304	48.5736
												45.0727	48.8581
												44.832	48.5571
												44.758	48.369
												44.508	47.966
												44.147	48.0491
												43.276	47.8536
												42.4113	47.4481
												41.6743	47.0498
												41.019	46.3728
												40.6027	45.7255
												40.0917	45.3561
												39.6853	45.1319
												39.2147	45.1002
												39.008	45.2096
												38.7057	45.3504
												38.733	45.344
												38.694	45.106
												38.5217	44.9902
												38.122	44.6522
												37.9623	44.342
												37.692	43.997
												37.546	43.806
												37.356	43.6003
												37.2513	43.5834
												37.332	43.6296
												37.3987	43.5887
												37.513	43.147
												37.54	42.7438
												37.2957	42.2547
												37.134	42.1396
												37.0797	42.149
												37.1343	42.4729
												37.302	42.7247
												37.4257	42.8212
												37.2917	42.8957
												37.323	42.5326
												37.2423	42.2375
												37.1853	41.9804
												37.295	42.0618
												37.2147	42.0912
												37.1257	41.9742
												36.9357	42.2876
												36.7177	42.3361
												36.5957	42.1737
												36.4473	41.8805
												36.336	41.4667

## Sheet: K M raw data
Wt								Wt Sufu								Rdx								Rdx Sufu
ptc				Ci-155				ptc				Ci-155				ptc				Ci-155				ptc				Ci-155
1	2	3	Mean	1	2	3	Mean	1	2	3	Mean	1	2	3	Mean	1	2	3	Mean	1	2	3	Mean	1	2	3	Mean	1	2	3	Mean
49.714	38.857	43	43.857	65.143	43.2857	49.429	52.6192	35.571	34.714	35.571	35.2853	76.8571	74.8571		75.8571	26.714	21.143	16.857	21.5713	66.4286	54.857	43.571	54.9522	32.571	32.429	33.143	32.7143	66.1429	65	69.2857	66.8095
47.429	38.429	40.429	42.0957	60	45	48.429	51.143	35.429	35.429	35	35.286	76.1429	73.1429		74.6429	27.571	21.286	19	22.619	67.1429	54.714	47.714	56.5236	30.714	31.571	32	31.4283	65.2857	62.1429	68	65.1429
52.429	39.857	41.714	44.6667	66.143	45.8571	48.429	53.4764	37.286	36.857	36.143	36.762	76.7143	77.8571		77.2857	27.429	21.429	18.857	22.5717	71.7143	56.143	48.571	58.8094	32.286	33.143	31.429	32.286	69.4286	63.8571	69	67.4286
50	44.429	39.714	44.7143	64.714	51.7143	50.571	55.6664	38.143	37.429	34.571	36.7143	73.4286	73.8571		73.6429	28.714	23.286	18.571	23.5237	72.4286	63	47.714	61.0475	31.571	33.857	30.571	31.9997	67.1429	65.2857	65.7143	66.0476
48.714	41.286	38.857	42.9523	65.714	48	51.429	55.0477	36.714	36.571	33	35.4283	73.1429	74.8571		74	29.571	21.857	18.286	23.238	74.8571	59.429	49.714	61.3334	29.714	33.286	30.143	31.0477	65.7143	64.1429	67.2857	65.7143
48.429	42.714	46.143	45.762	61.429	51.4286	57.571	56.8095	35.857	36.286	35.429	35.8573	76.5714	79		77.7857	28.857	22	18.286	23.0477	74.2857	56.714	48.143	59.7142	31.714	33.571	28.857	31.3807	69.8571	64.7143	63.4286	66
49.857	43	41.571	44.8093	65	52.1429	52	56.381	34.143	34.714	35	34.619	77.7143	76.5714		77.1428	29	22.429	20	23.8097	78	58.286	53.857	63.381	32.143	32.429	29.286	31.286	70.1429	66.1429	65.1429	67.1429
55.286	44	40.143	46.4763	71.714	55.8571	54	60.5237	33.571	34.143	33.714	33.8093	76.4286	74.5714		75.5	28.857	23.571	20	24.1427	73.1429	61.429	52.571	62.381	31.714	32.714	29.857	31.4283	69.8571	67.2857	67	68.0476
48.857	42.286	41.571	44.238	63.714	53.2857	55	57.3332	35.714	36.286	32.143	34.7143	71.2857	73.7143		72.5	28.857	24.714	19.714	24.4283	74.7143	66.429	49.714	63.6191	32.714	31.143	30.857	31.5713	74.5714	64	66.8571	68.4762
47.429	45.429	47.714	46.8573	64	57.4286	62.286	61.2382	35.286	35.571	32.857	34.5713	72.8571	72.8571		72.8571	29.857	24	20.714	24.857	75	62.571	52.286	63.2857	31.286	30.429	31.143	30.9527	68.8571	63.2857	67.5714	66.5714
50	43.571	45.143	46.238	66.857	54.7143	57.429	59.6668	34.857	34.857	32.286	34	71.4286	72.2857		71.8572	30.429	24.286	21.429	25.3813	77.1429	63.714	55.286	65.381	33	31.714	29.714	31.476	73.7143	70	65.8571	69.8571
49.429	43	45.857	46.0953	68.571	54.5714	58.857	60.6665	34	33.857	33.429	33.762	72.8571	74.8571		73.8571	30.857	25.571	22	26.1427	78.2857	68	56.143	67.4762	32.286	30.429	30.429	31.048	71.4286	67.1429	67.8571	68.8095
55.857	42	40.714	46.1903	71.714	53.8571	54.143	59.9047	34.857	34.571	32.714	34.0473	75.1429	76.7143		75.9286	30.429	25.286	22.429	26.048	77.2857	68.571	57	67.6189	32	30.857	31.429	31.4287	71.2857	69	71	70.4286
51.714	41.571	46.714	46.6663	68.286	50.5714	61.571	60.1428	34.857	34.429	32	33.762	75.1429	76.7143		75.9286	30.571	25.286	22.714	26.1903	79.8571	70.286	57.571	69.238	33	31.571	30.714	31.7617	74.4286	70.2857	70.8571	71.8571
55.714	43.714	44.429	47.9523	71.714	53.8571	56.714	60.7617	32.429	31.857	31	31.762	75.7143	81		78.3571	31	26.286	22	26.4287	77.1429	70.429	56.714	68.0953	31	32.143	30.857	31.3333	71.4286	69.4286	69.4286	70.0953
48.286	42.429	43.429	44.7147	66.571	54.1429	56	58.9046	33.429	32.714	34	33.381	79.7143	84		81.8571	31.571	24.429	22.714	26.238	82.7143	65	59.571	69.0951	31.143	32	30.429	31.1907	74.4286	71.8571	70.4286	72.2381
55.286	41.857	41.429	46.1907	70.429	53.1429	57	60.1906	33.286	32.571	34.143	33.3333	78.7143	78.2857		78.5	32	25	23.429	26.8097	80.1429	66.714	58.143	68.3333	30.857	31.571	30.857	31.095	71.2857	73	69.7143	71.3333
56.571	47.286	43.857	49.238	73.286	59.5714	58.714	63.8571	32	31.429	34.429	32.6193	81.7143	80.4286		81.0714	31.429	24.857	24	26.762	82.7143	68.286	58.714	69.9048	31.714	30.571	29.286	30.5237	72	70.7143	66.5714	69.7619
52	41.286	47.286	46.8573	66.857	54.7143	62.143	61.2381	33.286	32.857	33.429	33.1907	78.4286	77		77.7143	31.857	25.429	24.571	27.2857	79.8571	69.571	63.571	70.9997	31.286	31.286	30.429	31.0003	69.7143	72.5714	68	70.0952
56.714	41.429	45	47.7143	70.429	54.5714	59	61.3335	30.714	30.286	31.714	30.9047	79.4286	78.7143		79.0714	32.286	25.286	25	27.524	84.2857	65	62.714	70.6666	31.714	31	31	31.238	75.4286	69.8571	73.7143	73
50.571	44.857	43.429	46.2857	69.429	58	59.429	62.286	29.286	29.143	31.143	29.8573	85	84.5714		84.7857	31.857	27.286	26.714	28.619	83.4286	71	69.286	74.5715	31.286	32.429	29.429	31.048	72.4286	71.4286	70.5714	71.4762
55.286	47.857	44.143	49.0953	74.571	61.7143	61.571	65.9521	30.143	29.857	31.143	30.381	79.8571	84.4286		82.1429	32.571	27.286	26.286	28.7143	85	73.714	71.143	76.619	31.429	31.286	28.714	30.4763	71.7143	68	66.4286	68.7143
53	45.714	47.286	48.6667	77.286	63.2857	68	69.5239	30.714	30.429	31.571	30.9047	81.2857	84.5714		82.9286	35	26.571	26	29.1903	89.5714	66.857	70.571	75.6665	31.857	29.714	32	31.1903	73.4286	68	71.1429	70.8572
55.857	47	50.714	51.1903	76.714	67.8571	73.143	72.5714	28.571	28.143	33.857	30.1903	87.2857	87.1429		87.2143	34.857	26	27.429	29.4287	85.8571	68.286	69.857	74.6667	31.857	30.571	31.286	31.238	74.4286	71.4286	68.4286	71.4286
51.571	41.571	48.571	47.2377	75.286	61.4286	76	70.9049	28.714	27.857	32	29.5237	83.1429	81.8571		82.5	36.429	26.429	28.286	30.3813	92.5714	71.571	71.714	78.6188	29.571	30.286	30.429	30.0953	70	70	68.7143	69.5714
59.143	47.571	47.714	51.476	90.571	70.5714	79.571	80.2378	28	26.857	31.143	28.6667	77.8571	76		76.9286	36.143	27.286	30	31.143	88.7143	76.286	78.714	81.2381	30.286	31	32.429	31.2383	70.7143	69.1429	71.1429	70.3334
56.714	49.143	46.857	50.9047	80.857	77.1429	77.714	78.5713	28.286	27.857	33.429	29.8573	80	79		79.5	39.714	28.857	31.429	33.3333	96.1429	77.571	82.286	85.3333	31	32	31.571	31.5237	68.4286	68.8571	68.4286	68.5714
67.429	49.571	48.143	55.0477	93.429	76.8571	81.143	83.8097	28.571	28	32.857	29.8093	77.4286	77.1429		77.2858	42	31.143	32.571	35.238	100.571	86	83.857	90.1428	32.571	29.714	33.143	31.8093	71	64.5714	70.5714	68.7143
68.143	55.571	55.571	59.7617	96.143	82.8571	89.857	89.619	28.143	27.143	32.857	29.381	76.2857	77.1429		76.7143	46	33	34.714	37.9047	107.714	92.571	88.429	96.2381	32.857	30.429	33.571	32.2857	74.8571	66.8571	69.1429	70.2857
73.571	56.143	56.286	62	100.571	84.4286	94.286	93.0952	29.286	29.429	32.714	30.4763	74.7143	76.2857		75.5	48.714	34.571	37.571	40.2853	109.857	93	92.286	98.381	35.143	33.714	36.143	35	75.1429	75.4286	73.7143	74.7619
71.429	57.143	62.571	63.7143	90.857	87.1429	96.571	91.5236	29.571	30.429	34.857	31.619	79.1429	79.4286		79.2858	50.571	35.857	39.571	41.9997	117.857	88.429	98.143	101.476	37.429	34.714	36.571	36.238	77.4286	75.5714	74.1429	75.7143
73.143	59.714	67.571	66.8093	98.857	85.8571	100.429	95.0477	35.143	35.571	38.571	36.4283	81	79.8571		80.4286	57.571	40.286	42.286	46.7143	127.286	94.857	95.571	105.905	38.143	35.571	37	36.9047	71.1429	74.8571	72.8571	72.9524
81.143	61.143	67	69.762	110.286	86	91.286	95.8573	43.857	44.714	43.857	44.1427	90.4286	91.1429		90.7858	65.429	42.857	46.857	51.7143	134.429	99.143	96.571	110.048	43.571	37	42.714	41.095	78.2857	75	74.1429	75.8095
93.286	70	78.286	80.524	113.429	96.8571	99.571	103.286	55.286	54.571	46	51.9523	84.8571	84.5714		84.7142	70.714	50.714	57.857	59.7617	127.857	108.286	107.286	114.476	48.286	39.714	49.571	45.857	82	73.5714	77.5714	77.7143
96.714	80.286	79	85.3333	113.857	98.5714	94.857	102.428	67.429	67.143	52.714	62.4287	92.5714	87.5714		90.0714	83.571	57	65.143	68.5713	135.857	121.857	109.286	122.333	56.714	45.143	65	55.619	80	76.2857	80.1429	78.8095
116	83.286	96.286	98.524	121	91.5714	101.286	104.619	80.857	82.714	64.286	75.9523	95.2857	86.7143		91	95.143	65.143	77.857	79.381	136.714	119.143	115.286	123.714	77.286	59.571	84.143	73.6667	88.7143	83.4286	81.5714	84.5714
121.143	97	102.571	106.905	118	99.5714	94.714	104.095	98.143	100.143	78	92.0953	94.4286	89.2857		91.8572	109.429	79.429	97.429	95.429	141.143	127.857	113	127.333	94.286	80.857	94.429	89.8573	87.7143	85.7143	81	84.8095
141.714	115.286	127	128	116.714	94	94.286	101.667	117	122.286	102.429	113.905	103.857	97.8571		100.857	136.714	98.714	114.857	116.762	133.143	122.714	110.714	122.19	112	102.286	112.286	108.857	85.5714	79	82.1429	82.2381
170	120.143	132.571	140.905	110	83.4286	83.429	92.2859	134.571	144.143	127	135.238	98.5714	97.5714		98.0714	165.714	121.429	137.857	141.667	119.429	110.143	103.143	110.905	146.857	134	133.143	138	88	78	82.4286	82.8095
178.286	137.286	149.571	155.048	92.714	71.5714	76	80.0951	155.429	162.571	163.143	160.381	98.7143	95.5714		97.1428	188.571	154.857	164.857	169.428	104.143	105	95.857	101.667	175.429	165.429	155.714	165.524	83.7143	72.2857	84.2857	80.0952
190.429	145.429	148.714	161.524	80.429	64.1429	64.143	69.5716	164.571	171	197.714	177.762	96.2857	96.2857		96.2857	196.286	172.714	170.286	179.762	87.8571	89.714	85.571	87.714	193	166.857	177	178.952	75.2857	65.2857	75.7143	72.0952
186.714	147.571	136	156.762	71.571	59.4286	54.857	61.9522	153.571	155.143	195.714	168.143	86.7143	94.4286		90.5714	179.286	157.286	143.714	160.095	78.2857	70.429	70.429	73.0479	183.857	142	186.143	170.667	69.2857	63.5714	73.5714	68.8095
178.571	126.286	133.857	146.238	69.429	53.1429	55.286	59.286	103.429	96.429	162.286	120.715	82	91.2857		86.6429	132.429	121.571	102.286	118.762	69.4286	66.714	64.714	66.9522	120.143	94.714	134.286	116.381	60	54.8571	61.4286	58.7619
111.571	85	80.857	92.476	50.429	40	41.143	43.8573	59.429	55.143	90.857	68.4763	66.5714	77.7143		72.1428	66.857	63.286	51.429	60.524	59.7143	57	56.714	57.8094	48.857	76.571	68	64.476	53.4286	53.4286	52.7143	53.1905
65.143	54.714	50.857	56.9047	39.714	33.1429	32.714	35.1903	54.857	51.571	57.571	54.6663	62.8571	66.7143		64.7857	40.571	33.429	39.143	37.7143	57.2857	52.714	53	54.3332	35	68.286	46.286	49.8573	54.1429	53	52.1429	53.0953
55.286	48.571	53.143	52.3333	38.143	31.2857	34.143	34.5239	58.714	54.857	59.571	57.714	61.1429	62.2857		61.7143	34.857	28.286	37.714	33.619	56.5714	48.429	52.286	52.4288	37	60.571	71.143	56.238	51.7143	52.5714	52.4286	52.2381
55.429	50	52.857	52.762	35	31.2857	33.286	33.1906	69.286	64.286	60.429	64.667	62	63		62.5	36.714	29.143	36.286	34.0477	57.2857	47.857	50	51.7142	38.714	49	98.286	62	49.1429	47	50	48.7143
59	56.857	52.714	56.1903	38.143	32.7143	33.143	34.6668	65.429	60.286	66	63.905	64.8571	63.5714		64.2142	43.714	30.714	37.429	37.2857	59.1429	51.571	49	53.238	44.429	43.714	102.714	63.619	51.5714	45.1429	53.2857	50
58.143	54.429	48.286	53.6193	37	30.8571	29.571	32.476	55.571	50.857	75.429	60.619	64.2857	62.7143		63.5	47.571	29.571	38.714	38.6187	60.1429	51.857	49.857	53.9523	49.143	40	86.714	58.619	48.2857	42.5714	48.1429	46.3333
63	59.857	55.286	59.381	38.143	33.7143	32.857	34.9048	49	44.714	81	58.238	63	63		63	45.571	29.571	40.286	38.476	58.2857	53.286	47	52.8572	56	40.286	94.714	63.6667	50.8571	40.4286	49.7143	47
64.571	59.714	46.714	56.9997	38.571	34.4286	31.429	34.8095	46	45.429	82	57.8097	61	65.2857		63.1429	41.714	29.714	45	38.8093	56.1429	48.714	49.286	51.381	43.714	46.429	83.857	58	40.8571	39.7143	44.2857	41.619
68.286	56.571	48.571	57.8093	40.429	32	33.286	35.2383	45.429	44.714	84.857	58.3333	60.8571	60.7143		60.7857	44	31.714	45.714	40.476	55.2857	49.286	52.714	52.4286	42.714	53.286	69.857	55.2857	39.8571	38.4286	41.1429	39.8095
67.571	55.857	46.714	56.714	39.571	33.1429	31	34.5713	46.429	46.857	80.286	57.8573	62.5714	62.5714		62.5714	56	34.429	45	45.143	56.5714	50.571	48.143	51.7618	42.571	60.714	58.571	53.952	40.2857	37	40	39.0952
69	56.714	48.714	58.1427	39.143	32.1429	33.714	35	42	42.429	78.571	54.3333	63.5714	62.7143		63.1428	63.714	34	53	50.238	56.5714	50.857	49.571	52.3331	39.857	62	42.571	48.1427	39.7143	35.7143	38.8571	38.0952
67.571	56.143	44.571	56.095	39.286	32.1429	29.429	33.6193	40.429	40.857	81.143	54.143	62.8571	63.8571		63.3571	63.429	33.143	67.286	54.6193	57.1429	50.143	48.714	52	34.429	62.571	34.857	43.9523	35.7143	33.1429	34	34.2857
57.714	56.143	48	53.9523	37.429	33.2857	32	34.2382	34.429	35	81.286	50.2383	63.2857	62.8571		63.0714	52.286	39.429	80.857	57.524	55.2857	51.857	51.714	52.9522	40	60.286	43	47.762	36	31.5714	34.5714	34.0476
55	46.714	45.286	49	34.286	27.4286	29.571	30.4285	27.857	28.571	82.286	46.238	67.7143	68.1429		67.9286	40.286	43.571	53.857	45.9047	57.2857	52.429	39	49.5716	47	54.571	57.429	53	35.7143	29.5714	33.8571	33.0476
56	39.714	41.714	45.8093	35.429	24.8571	28	29.4287	23	23	67.571	37.857	60.1429	63		61.5714	34.571	39.714	30.714	34.9997	54.4286	51	24.714	43.3809	48.571	47.143	62.286	52.6667	34	28.1429	34.1429	32.0953
52.714	43.571	45.857	47.3807	33.286	26.2857	29	29.5239	23.143	23	61.429	35.8573	58.5714	59.4286		59	34.286	37.857	15.143	29.0953	52	50.286	12.714	38.3333	48.143	41.714	69.857	53.238	32.1429	24.1429	32.1429	29.4762
55.714	45.286	41.286	47.4287	34.714	28.4286	27.286	30.1429	22.429	22.286	58	34.2383	57.8571	58.5714		58.2142	35	39.429	2.857	25.762	53.7143	47	2.714	34.4761	44.571	37.857	78.143	53.5237	29.4286	22.7143	31.2857	27.8095
53.857	50	46.571	50.1427	35.714	29.5714	29.286	31.5238	21.286	21.571	51.857	31.5713	57	61.5714		59.2857	32.286	43.571	0	25.2857	51.7143	46	0	32.5714	44.714	35.286	80.714	53.5713	28.5714	20.8571	29	26.1428
51.857	51.286	45.571	49.5713	34.857	28.8571	28.429	30.7144	20.286	20.714	49.714	30.238	58	51.5714		54.7857	32	44.429	0	25.4763	51.7143	42	0	31.2381	40.571	29.857	69.143	46.5237	25.1429	17.7143	27.7143	23.5238
55.286	48.571	42.286	48.7143	34.857	28.4286	27	30.0952	19.286	18.857	43.857	27.3333	52.8571	33.2857		43.0714	33.857	31.143	0	21.6667	53.4286	34	0	29.1429	33.714	28.286	48.571	36.857	23.4286	16.8571	24.2857	21.5238
53.857	50	41.857	48.5713	34	29.8571	26.286	30.0477	19.429	18.857	27.857	22.0477	34.5714	14.5714		24.5714	35	17.714	0	17.5713	53.5714	24.857	0	26.1428	24.429	24	34.571	27.6667	22.1429	15.5714	22.4286	20.0476
46.286	50.714	41.143	46.0477	31.143	30.7143	25.714	29.1904	21.714	20.714	14.857	19.095	20.2857	2		11.1428	35.571	7.143	0	14.238	52.7143	11.857	0	21.5238	17.714	18	24.429	20.0477	18.2857	13	18.1429	16.4762
47.571	43.714	42.571	44.6187	29.857	28.1429	26	28	21.429	20.143	4.714	15.4287	6.4286	0		3.2143	36.571	0	0	12.1903	52.7143	0	0	17.5714	16.571	14.286	21.143	17.3333	17.4286	10.8571	17.8571	15.3809
36.857	42.143	36.571	38.5237	22.429	25.4286	23.857	23.9049	17.286	17.143	0	11.4763	0	0		0	0	0	0	0	0	0	0	0	15.571	13	19.143	15.9047	16.7143	10.4286	16.5714	14.5714
24.286	40.714	38.571	34.5237	12.857	25.5714	23.571	20.6665	14.429	14.857	0	9.762	0	0		0	0	0	0	0	0	0	0	0	15.143	12.286	17.143	14.8573	14.8571	8	14	12.2857
13.143	37.143	39.286	29.8573	7	22.2857	21.429	16.9049	12.857	13.571	0	8.80933	0	0		0	0	0	0	0	0	0	0	0	16.286	7.714	16	13.3333	13.4286	4	12.4286	9.9524
2.143	38.571	39.429	26.7143	0.857	22.4286	21.714	14.9999	12.429	13	0	8.47633	0	0		0	0	0	0	0	0	0	0	0	16.143	0.143	15.429	10.5717	12.5714	0	11.4286	8
0	37.429	40.143	25.8573	0	23.7143	23	15.5714	11.429	12.143	0	7.85733	0	0		0	0	0	0	0	0	0	0	0	15.429	0	15	10.143	11.8571	0	11.2857	7.71427
0	36.714	41.714	26.1427	0	22.7143	23	15.2381	10.429	11.143	0	7.19067	0	0		0	0	0	0	0	0	0	0	0	13.429	0	13.571	9	9	0	9	6
0	36.857	39.714	25.5237	0	22.4286	22.286	14.9049	10.143	10.714	0	6.95233	0	0		0	0	0	0	0	0	0	0	0	13.286	0	14.143	9.143	8.4286	0	7.4286	5.28573
0	31.857	41.429	24.4287	0	20.1429	23.143	14.4286	9.857	10.571	0	6.80933	0	0		0	0	0	0	0	0	0	0	0	11.286	0	15.857	9.04767	6.1429	0	6.5714	4.2381
0	32.714	34.429	22.381	0	19	20.286	13.0953	9.571	10.143	0	6.57133	0	0		0	0	0	0	0	0	0	0	0	1.429	0	13	4.80967	0.4286	0	4.2857	1.57143
0	35.857	39	24.9523	0	21.2857	23.286	14.8572	8.286	8	0	5.42867	0	0		0	0	0	0	0	0	0	0	0	0	0	1.143	0.381	0	0	0.4286	0.142867
0	32.857	36.714	23.1903	0	20.8571	21.714	14.1904	5.714	4.714	0	3.476	0	0		0	0	0	0	0	0	0	0	0	0	0	0	0	0	0	0	0
0	34.714	33.571	22.7617	0	20.5714	19.714	13.4285	3.429	2.429	0	1.95267	0	0		0	0	0	0	0	0	0	0	0	0	0	0	0	0	0	0	0
0	38.714	37.143	25.2857	0	22.7143	20.429	14.3811	1.143	0.429	0	0.524	0	0		0	0	0	0	0	0	0	0	0	0	0	0	0	0	0	0	0
0	48	35.429	27.8097	0	25.5714	19	14.8571	0	0	0	0	0	0		0	0	0	0	0	0	0	0	0	0	0	0	0	0	0	0	0
0	51.143	28.714	26.619	0	26.2857	15.857	14.0476	0	0	0	0	0	0		0	0	0	0	0	0	0	0	0	0	0	0	0	0	0	0	0
0	47	23.571	23.5237	0	24	10	11.3333	0	0	0	0	0	0		0	0	0	0	0	0	0	0	0	0	0	0	0	0	0	0	0
0	50.429	12.286	20.905	0	29.1429	5	11.381	0	0	0	0	0	0		0	0	0	0	0	0	0	0	0	0	0	0	0	0	0	0	0
0	48.429	1	16.4763	0	25	0.286	8.42867	0	0	0	0	0	0		0	0	0	0	0	0	0	0	0	0	0	0	0	0	0	0	0
0	35.429	0	11.8097	0	16.4286	0	5.4762	0	0	0	0	0	0		0	0	0	0	0	0	0	0	0	0	0	0	0	0	0	0	0
0	17.857	0	5.95233	0	8.1429	0	2.7143	0	0	0	0	0	0		0	0	0	0	0	0	0	0	0	0	0	0	0	0	0	0	0
0	6.286	0	2.09533	0	2.1429	0	0.7143	0	0	0	0	0	0		0	0	0	0	0	0	0	0	0	0	0	0	0	0	0	0	0
