# Supplementary material for: Drosophila hedgehog can act as a morphogen in the absence of regulated Ci processing
Source: eLife. 2020 Oct 21;9:e61083. doi: 10.7554/eLife.61083 (PMC7679133; doi:10.7554/eLife.61083)
Supplement: Figure 2—source data 1. [file elife-61083-fig2-data1.xlsx]

## Sheet: Final AP G"-J"
G"				H"				I"				J"				K"
crWt				crS849A				gS849A				crP(1-3)A				cr∆1270-1370
ptc	Ci-155			ptc	Ci-155			ptc	Ci-155			ptc	Ci-155			ptc	Ci-155
26.2857	61.3335			30.4287	111.143			17.3333	101.238			28.1427	110.762			17.5516	104.726
29.0953	62.286			29.619	107.048			18.4287	106.048			26.8097	107.238			17.5993	97.4086
28.6667	65.9521			28.7617	111.286			18.0953	101.191			30.143	114.524			19.9008	96.3173
31.1903	69.5239			28	105.19			19.1907	109.524			30.524	114.524			20.7142	103.992
27.2377	72.5714			27.143	107.857			19.762	101.095			28.5237	106.143			18.4643	118.615
31.476	70.9049			27.048	111.476			20.381	104			32.0477	116.143			19.9485	103.492
30.9047	80.2378			28.0477	107.333			20.0477	103.143			33.7617	116.952			21.9484	108.734
35.0477	78.5713			30.3333	107.857			21.9523	106			32.1907	105.714			21.5992	105.734
39.7617	83.8097			31.3333	111.143			22.8573	111.81			32.524	99.6663			23.9166	105.643
42	89.619			34.9047	108.476			24.6667	116.095			37.5713	102.952			26.4246	98.7222
43.7143	93.0952			38.4287	108.095			28.619	105.524			41.6667	102.905			28.6309	104.813
46.8093	91.5236			43.143	106.19			34.9523	100			45	103.952			31.7778	105.873
49.762	95.0477			50.1427	114.476			48.381	99.8573			52.3333	109.238			33.5874	101.845
60.524	95.8573			62.095	108.905			60.7617	96.905			59.8097	101.333			41.2341	115.318
65.3333	103.286			80.4763	107.333			72	99.8093			68.7143	95.381			46.2302	119.484
78.524	102.428			89.1427	109.714			89.5237	87.3333			81.8097	89.3333			49.2024	121.75
86.9047	104.619			101.715	93.762			108.381	77.6667			93.0473	77.333			52.8096	114.004
108	104.095			115.476	85.3807			126.286	72.0477			109.952	70.095			64.2064	100.841
120.905	101.667			125.952	76			144.857	70.571			125.286	62.9047			78.8968	99.6469
135.048	92.2859			144.333	66.667			154.476	62.5237			129.952	53.9047			82.6151	102.242
141.524	80.0951			142.619	58.5713			157.714	57.762			121.143	47.2383			75.8809	94.1586
136.762	69.5716			128.524	51			154.381	51.9523			88.0477	38.0953			54.3056	64.1984
126.238	61.9522			83.048	47.476			140.857	45.619			52.0003	28.857			31.4206	36.0397
72.476	59.286			43.857	37.238			86.3813	32.381			29.9523	24.4287			24.9999	22.7066
36.9047	43.8573			29.8573	28.4763			30.1907	20.9523			22.2857	23.619			22.0833	21.1706
32.3333	35.1903			27.619	24.1907			14.0477	17.2857			19.8097	23.4763			22.6507	22.5079
32.762	34.5239			25.4763	25.8093			14.2857	16.143			22.095	25.3333			25.8015	22.1508
36.1903	33.1906			24.7617	23.5237			13.857	16.524			23.7143	26.143			25.6548	26.0754
33.6193	34.6668			24.2383	19.619			13.857	16.9043			26.3333	26.143			24.5754	25.5198
39.381	32.476			24.238	17.6193			13.7617	17.9523			29.4283	27			25.5159	24.5118

## Sheet: K
Not normalized						Normalized (Average of 5 data points for smoothing)
crWt	crWt	crP(1-3)A	∆1270-1370			crWt	crWt	crP(1-3)A	∆1270-1370
ptc	Ci-155	Ci-155	Ci-155			ptc	Ci-155	Ci-155	Ci-155
24.7143	53.4764	113.476	111.271			24.9429	55.4762	113.143	113.825
22.9523	55.6664	113.476	111.542			24.8476	56.8857	113.971	114.942
25.762	55.0477	109.286	115.625			25.6286	57.219	113.543	118.633
24.8093	56.8095	114.714	117.917			25.7238	58.4571	115.914	120.654
26.4763	56.381	114.762	112.771			25.981	59.0286	115.152	119.346
24.238	60.5237	117.619	116.854			25.9238	59.8857	114.514	118.638
26.8573	57.3332	111.333	130			26.4095	59.7619	114.352	120.513
26.238	61.2382	121.143	125.729			26.6285	60.3238	116.029	121.033
26.0953	59.6668	110.905	111.375			26.3238	60.2285	115.952	119.375
26.1903	60.6665	111.571	109.229			26.3429	60.0761	117.571	119.917
26.6663	59.9047	116.809	126.229			26.9524	59.9809	119.276	121.367
27.9523	60.1428	119.714	132.604			26.9906	60.7714	121.114	121.313
24.7147	60.7617	120.762	117.438			26.943	60.9904	121.438	119.492
26.1907	58.9046	119	114.083			27.2572	61.1048	122.438	119.417
29.238	60.1906	120.095	116.479			27.8381	61.7811	123.086	121.933
26.8573	63.8571	126	125.958			27.7239	62.9334	124.972	127.254
27.7143	61.2381	121.333	123.5			28.5905	64.0667	125.676	129.446
26.2857	61.3335	125.762	117.063			28.4951	66.3334	125.638	131.983
29.0953	62.286	122.238	126.667			29.5332	68.2476	126.714	134.575
28.6667	65.9521	129.524	143.083			29.8951	71.838	128.657	133.246
31.1903	69.5239	129.524	136.917			31.1713	74.3618	126.895	131.521
27.2377	72.5714	121.143	136.187			32.8855	77.219	123.924	129.1
31.476	70.9049	131.143	130.021			35.838	80.6285	123.286	124.079
30.9047	80.2378	131.952	120.021			38.2857	85.0666	120.638	122.242
35.0477	78.5713	120.714	134.458			41.4666	87.3238	118.038	121.975
39.7617	83.8097	114.666	124.813			44.4095	90.6191	118.743	116.167
42	89.619	117.952	111.083			48.5619	93.0286	119.076	115.004
43.7143	93.0952	117.905	120.833			53.2286	95.7619	117.562	118.338
46.8093	91.5236	118.952	118.687			60.1905	97.6286	114.848	118.687
49.762	95.0477	124.238	105.417			68.2096	100.248	109.524	119.575
60.524	95.8573	116.333	119			79.8572	102.057	101.695	121.05
65.3333	103.286	110.381	127.75			91.9333	103.219	94.0094	121.079
78.524	102.428	104.333	122.583			105.876	101.019	85.7141	119.812
86.9047	104.619	92.333	123.125			118.476	96.5524	77.2951	115.192
108	104.095	85.095	112.792			128.448	89.5429	69.4476	106.708
120.905	101.667	77.9047	119.146			132.095	81.1143	61.2	96.0958
135.048	92.2859	68.9047	121.417			122.409	72.6382	53.5048	81.2875
141.524	80.0951	62.2383	99.4792			102.781	62.9525	47.4477	64.9542
136.762	69.5716	53.0953	80.7083			80.9427	53.9715	42.6953	53.0959
126.238	61.9522	43.857	59.7292			60.1428	46.9619	40.1429	45.3292
72.476	59.286	39.4287	45.1041			42.1333	41.2096	39.6001	41.1
36.9047	43.8573	38.619	39.7502			34.3619	36.2858	39.9429	40.2751
32.3333	35.1903	38.4763	40.1876			34.8572	34.0095	40.6191	41.0542
32.762	34.5239	40.3333	41.8751			35.7905	33.9524	40.2477	42.925
36.1903	33.1906	41.143	38.5832			36.7999	34.0095	38.6953	44.3541
33.6193	34.6668	41.143	40.9793			34.3333	33	38.0834	45.7968
39.381	32.476	42	43.6457			32.0475	30.8667	37.0636	47.4027
36.9997	34.9048	36.619	49.5418			30.2142	30.4643	34.5953	49.2812
37.8093	34.8095	32.5717	49.0207			27.9523	28.9842	32.5717	49.0207
23.8573	28.143					23.0238	26.0715	#DIV/0!	#DIV/0!
22.1903	24					22.1903	24	#DIV/0!	#DIV/0!

## Sheet: L
											Saturating Value
											121.138
crWt	crWt	crS849A	crP(1-3)A	Average 849 and p1-3A				crWt	crWt	Average	Difference between Saturation and Ci Value
ptc	Ci-155	Ci-155	Ci-155	Ci-155				ptc	Ci-155	Ci-155	Ci-155	Differential Wt Ci-155
24.7143	53.4764	136.047	113.476	124.762				24.7143	53.4764	124.762	-3.62329	49.8531
22.9523	55.6664	132.428	113.476	122.952				22.9523	55.6664	122.952	-1.81379	53.8526
25.762	55.0477	128.191	109.286	118.738				25.762	55.0477	118.738	2.40021	57.4479
24.8093	56.8095	127.667	114.714	121.191				24.8093	56.8095	121.191	-0.05212	56.7574
26.4763	56.381	133.953	114.762	124.357				26.4763	56.381	124.357	-3.21879	53.1622
24.238	60.5237	132.667	117.619	125.143				24.238	60.5237	125.143	-4.00445	56.5192
26.8573	57.3332	118.524	111.333	114.929				26.8573	57.3332	114.929	6.20988	63.5431
26.238	61.2382	126.666	121.143	123.905				26.238	61.2382	123.905	-2.76629	58.4719
26.0953	59.6668	122.762	110.905	116.833				26.0953	59.6668	116.833	4.30505	63.9718
26.1903	60.6665	127.381	111.571	119.476				26.1903	60.6665	119.476	1.66221	62.3287
26.6663	59.9047	124.619	116.809	120.714				26.6663	59.9047	120.714	0.424047	60.3287
27.9523	60.1428	128	119.714	123.857				27.9523	60.1428	123.857	-2.71879	57.424
24.7147	60.7617	122.286	120.762	121.524				24.7147	60.7617	121.524	-0.385453	60.3762
26.1907	58.9046	126.952	119	122.976				26.1907	58.9046	122.976	-1.83779	57.0668
29.238	60.1906	120.619	120.095	120.357				29.238	60.1906	120.357	0.78138	60.972
26.8573	63.8571	126.143	126	126.072				26.8573	63.8571	126.072	-4.93329	58.9238
27.7143	61.2381	121.143	121.333	121.238				27.7143	61.2381	121.238	-0.0997867	61.1383
26.2857	61.3335	117.048	125.762	121.405				26.2857	61.3335	121.405	-0.266453	61.067
29.0953	62.286	121.286	122.238	121.762				29.0953	62.286	121.762	-0.623453	61.6625
28.6667	65.9521	115.19	129.524	122.357				28.6667	65.9521	122.357	-1.21879	64.7333
31.1903	69.5239	117.857	129.524	123.691				31.1903	69.5239	123.691	-2.55229	66.9716
27.2377	72.5714	121.476	121.143	121.309				27.2377	72.5714	121.309	-0.17112	72.4002
31.476	70.9049	117.333	131.143	124.238				31.476	70.9049	124.238	-3.09979	67.8051
30.9047	80.2378	117.857	131.952	124.905				30.9047	80.2378	124.905	-3.76645	76.4713
35.0477	78.5713	121.143	120.714	120.929				35.0477	78.5713	120.929	0.20988	78.7812
39.7617	83.8097	118.476	114.666	116.571				39.7617	83.8097	116.571	4.56705	88.3767
42	89.619	118.095	117.952	118.024				42	89.619	118.024	3.11455	92.7336
43.7143	93.0952	116.19	117.905	117.048				43.7143	93.0952	117.048	4.09088	97.1861
46.8093	91.5236	124.476	118.952	121.714				46.8093	91.5236	121.714	-0.575787	90.9478
49.762	95.0477	118.905	124.238	121.571				49.762	95.0477	121.571	-0.432953	94.6147
60.524	95.8573	117.333	116.333	116.833				60.524	95.8573	116.833	4.30505	100.162
65.3333	103.286	119.714	110.381	115.048				65.3333	103.286	115.048	6.09071	109.376
78.524	102.428	103.762	104.333	104.048				78.524	102.428	104.048	17.0907	119.519
86.9047	104.619	95.3807	92.333	93.8568				86.9047	104.619	93.8568	27.2815	131.901
108	104.095	86	85.095	85.5475				108	104.095	85.5475	35.5909	139.686
120.905	101.667	76.667	77.9047	77.2858				120.905	101.667	77.2858	43.8525	145.519
135.048	92.2859	68.5713	68.9047	68.738				135.048	92.2859	68.738	52.4004	144.686
141.524	80.0951	61	62.2383	61.6192				141.524	80.0951	61.6192	59.5192	139.614
136.762	69.5716	57.476	53.0953	55.2857				136.762	69.5716	55.2857	65.8527	135.424
126.238	61.9522	47.238	43.857	45.5475				126.238	61.9522	45.5475	75.5909	137.543
72.476	59.286	38.4763	39.4287	38.9525				72.476	59.286	38.9525	82.1859	141.472
36.9047	43.8573	34.1907	38.619	36.4048				36.9047	43.8573	36.4048	84.7335	128.591
32.3333	35.1903	35.8093	38.4763	37.1428				32.3333	35.1903	37.1428	83.9955	119.186
32.762	34.5239	33.5237	40.3333	36.9285				32.762	34.5239	36.9285	84.2099	118.734
36.1903	33.1906	29.619	41.143	35.381				36.1903	33.1906	35.381	85.7574	118.948
33.6193	34.6668	27.6193	41.143	34.3812				33.6193	34.6668	34.3812	86.7572	121.424
39.381	32.476	28.0477	42	35.0238				39.381	32.476	35.0238	86.1145	118.591
36.9997	34.9048	25.619	36.619	31.119				36.9997	34.9048	31.119	90.0194	124.924
37.8093	34.8095	24.762	32.5717	28.6668				37.8093	34.8095	28.6668	92.4715	127.281

## Sheet: raw material
63X
Wt								gCiWt								crCIS849A								gCIS849A								crCiP(1-3)A								crCi1270-1370
ptc				Ci-155				ptc				Ci-155				ptc				Ci-155				ptc				Ci-155				ptc				Ci-155				ptc				Ci-155
1	2	3	Mean	1	2	3	Mean	1	2	3	Mean	1	2	3	Mean	1	2	3	Mean	1	2	3	Mean	1	2	3	Mean	1	2	3	Mean	1	2	3	Mean	1	2	3	Mean	1	2	3	Mean	1	2	3	4	Mean
49.714	38.857	43	43.857	65.143	43.2857	49.429	52.6192	33.571	33.286	32.857	33.238	41.7143	43.5714	38.2857	41.1905	44.286	42.143	45.714	44.0477	127.571	137	137.857	134.143	41.286	47.571	35.857	41.5713	138.143	99.714	111.571	116.476	58.286	47.286	47.714	51.0953	112.429	87.857	84.571	94.9523	42	44.75	40.2857	42.3452	120	67	110.25	124.333	105.396
47.429	38.429	40.429	42.0957	60	45	48.429	51.143	35.143	36	34.429	35.1907	46	47.7143	37.1429	43.6191	46	40.857	44.286	43.7143	134	121.143	145.286	133.476	40.571	52.429	38	43.6667	127.857	104.429	120.714	117.667	55.714	45.429	52.429	51.1907	96.286	84.429	94.571	91.762	42.2857	42.75	41.4286	42.1548	101	79.3333	125.75	130.667	109.188
52.429	39.857	41.714	44.6667	66.143	45.8571	48.429	53.4764	34.143	34.571	37.571	35.4283	42.2857	42.8571	36	40.3809	47	40	43.714	43.5713	139	124.286	120.429	127.905	39.143	50.714	38.143	42.6667	131.714	115.857	120.714	122.762	54.857	49.857	52.714	52.476	92.857	97.429	95.286	95.1907	42.4286	37.75	41.5714	40.5833	127.333	97.3333	114.25	111	112.479
50	44.429	39.714	44.7143	64.714	51.7143	50.571	55.6664	32.857	32.143	41.571	35.5237	38	37.7143	37.5714	37.7619	45.571	43	43.286	43.9523	136.571	141.857	129.714	136.047	43.143	48.143	38.857	43.381	141.571	110.429	112.143	121.381	55.857	53.286	49	52.7143	93.429	104	88.143	95.1907	42.7143	42.25	40.5714	41.8452	136	81.6667	94.5	132.333	111.125
48.714	41.286	38.857	42.9523	65.714	48	51.429	55.0477	34.143	33.571	45.714	37.8093	36	36.2857	43.1429	38.4762	45.857	42.429	44.714	44.3333	124.714	137.857	134.714	132.428	48.286	48.714	43.714	46.9047	141.857	114	121.714	125.857	55	51.571	49.429	52	91.714	97.571	91.143	93.476	37	39.75	38.7143	38.4881	102.333	77.6667	130	143.333	113.333
48.429	42.714	46.143	45.762	61.429	51.4286	57.571	56.8095	34.143	33.857	42.286	36.762	37.4286	36.4286	37.5714	37.1429	46.571	41	43.429	43.6667	120.857	132.429	131.286	128.191	44.714	48.857	41	44.857	129.714	108.286	115	117.667	57.286	46.714	49.714	51.238	103	86.857	90.571	93.476	40.4286	43.75	38.1429	40.7738	90.333	84	123.25	157.667	113.812
49.857	43	41.571	44.8093	65	52.1429	52	56.381	33.143	32.286	40.857	35.4287	33.5714	33.4286	37.7143	34.9048	43	41.429	43.429	42.6193	125	126.714	131.286	127.667	42.286	49.857	40.429	44.1907	122.429	107.857	109	113.095	54.286	46.857	46.714	49.2857	95.429	91.857	80.571	89.2857	42.4286	40.25	37.2857	39.9881	114.667	71	142.75	116.667	111.271
55.286	44	40.143	46.4763	71.714	55.8571	54	60.5237	29	29.143	39	32.381	34.7143	33.8571	38.4286	35.6667	42	41.429	44.714	42.7143	141.286	130.429	130.143	133.953	38.143	49.857	39.429	42.4763	110.714	115.571	113.714	113.333	58.857	47	49.571	51.8093	104.286	92.714	87.143	94.7143	41.7143	36.25	37.2857	38.4167	146	82	127.5	90.667	111.542
48.857	42.286	41.571	44.238	63.714	53.2857	55	57.3332	32.571	31.857	36.143	33.5237	32.8571	32.1429	33	32.6667	42	41	41.143	41.381	134.714	131.286	132	132.667	37.143	51.714	36.429	41.762	113.429	127.857	108.571	116.619	58.286	48.286	49.714	52.0953	101.714	93.714	88.857	94.7617	39.2857	33.5	38.4286	37.0714	162	106.333	100.5	93.667	115.625
47.429	45.429	47.714	46.8573	64	57.4286	62.286	61.2382	32.571	31.571	33.857	32.6663	32.2857	29.8571	31.2857	31.1428	41	40.571	36.714	39.4283	127.429	120.857	107.286	118.524	36.714	51.857	35.857	41.476	110.429	125.286	101.429	112.381	59.143	50.571	48.429	52.7143	102	103.714	87.143	97.619	40.8571	38	38	38.9524	142	119	90	120.667	117.917
50	43.571	45.143	46.238	66.857	54.7143	57.429	59.6668	31.571	31.857	32.143	31.857	32	32.2857	31.4286	31.9048	42.714	38.143	35.857	38.9047	131.857	127.571	120.571	126.666	38.429	47.143	35	40.1907	121.286	120.714	95.714	112.571	56.429	48.714	46.714	50.619	96.714	95.714	81.571	91.333	40.8571	43	41.1429	41.6667	130.667	90.3333	104.75	125.333	112.771
49.429	43	45.857	46.0953	68.571	54.5714	58.857	60.6665	31.286	30.286	32.143	31.2383	28.8571	27.5714	32.5714	29.6666	39.571	39.714	39.429	39.5713	114.286	126.571	127.429	122.762	35.857	42	35.857	37.9047	121.571	119.857	118.429	119.952	68.857	50.571	46	55.1427	124.429	99.857	79.143	101.143	42.7143	41.75	41.8571	42.1071	145.333	73.6667	131.75	116.667	116.854
55.857	42	40.714	46.1903	71.714	53.8571	54.143	59.9047	31.429	31.143	29.857	30.8097	29.8571	29	31.5714	30.1428	37.143	37.714	40.571	38.476	117.429	128.857	135.857	127.381	36	39.571	36.429	37.3333	127.857	114.714	112.143	118.238	56.143	51.143	46.286	51.1907	94.143	96.714	81.857	90.9047	43.2857	36	40.5714	39.9524	160	91	126	143	130
51.714	41.571	46.714	46.6663	68.286	50.5714	61.571	60.1428	32.714	32.429	29.286	31.4763	32.2857	33	30.7143	32	39.714	36.429	42.857	39.6667	122.286	124.286	127.286	124.619	37.714	37.286	35	36.6667	134.143	115.714	93.429	114.429	55.857	47	49.429	50.762	96.286	88.714	89.714	91.5713	41.7143	35.75	39.5714	39.0119	177	92	102.25	131.667	125.729
55.714	43.714	44.429	47.9523	71.714	53.8571	56.714	60.7617	33.429	32.429	28.571	31.4763	31	31.1429	29.5714	30.5714	40.429	38	43.571	40.6667	127.429	129	127.571	128	38.429	38	36	37.4763	129	118.286	102.857	116.714	58	46.429	51.429	51.9527	108.571	88.857	93	96.8093	42.4286	36.75	38.5714	39.25	139.333	88.3333	107.5	110.333	111.375
48.286	42.429	43.429	44.7147	66.571	54.1429	56	58.9046	33.429	32.714	28.857	31.6667	32	31.2857	27.4286	30.2381	41.571	37.143	43.571	40.7617	125.571	117.143	124.143	122.286	40.286	35.857	36.286	37.4763	132	115.429	110.571	119.333	64.143	47.857	47.714	53.238	126.286	89.857	83	99.7143	39.5714	37	40.1429	38.9048	108	81	127.25	120.667	109.229
55.286	41.857	41.429	46.1907	70.429	53.1429	57	60.1906	30.714	29.286	26.571	28.857	35	33.5714	27.4286	32	42.286	36.429	46.714	41.8097	129.429	122.857	128.571	126.952	38.429	34.286	36.143	36.286	121.714	113.571	97.857	111.047	58.143	54.857	48.143	53.7143	113.286	105.571	83.429	100.762	41	37	40	39.3333	122.667	101	129.25	152	126.229
56.571	47.286	43.857	49.238	73.286	59.5714	58.714	63.8571	29.714	29.286	27.429	28.8097	31.4286	29.8571	27.1429	29.4762	45	37.429	45	42.4763	117.286	127.857	116.714	120.619	34	34	37.714	35.238	117.286	105.857	100.143	107.762	58	51.571	48.714	52.7617	110.429	99.857	86.714	99	40.1429	33	40.5714	37.9048	148.667	107.333	131.75	142.667	132.604
52	41.286	47.286	46.8573	66.857	54.7143	62.143	61.2381	26.857	26.571	28.429	27.2857	27.7143	27.4286	27.5714	27.5714	49.714	34.286	43.571	42.5237	132.286	120.857	125.286	126.143	34.143	33.857	35.429	34.4763	123.143	106.429	93	107.524	59.571	47	51.571	52.714	117.714	89	93.571	100.095	42.4286	35.25	39	38.8929	151.667	89.3333	102.75	126	117.438
56.714	41.429	45	47.7143	70.429	54.5714	59	61.3335	26.429	26.286	26.714	26.4763	26.8571	25.8571	27.2857	26.6666	44	35.857	43.429	41.0953	119.286	117.429	126.714	121.143	35.143	36.286	37.571	36.3333	118.714	120.286	113.286	117.429	60.857	49.571	54.429	54.9523	119.429	99.286	99.286	106	41	37.5	40.2857	39.5952	137.667	79.3333	113	126.333	114.083
50.571	44.857	43.429	46.2857	69.429	58	59.429	62.286	28.143	27.714	26	27.2857	28.4286	27.4286	27.4286	27.7619	42.714	37.286	41.286	40.4287	121.143	120	110	117.048	36.714	37.286	38	37.3333	113.429	104.571	100.714	106.238	57.714	51	49.571	52.7617	113.857	101.714	88.429	101.333	38.1429	37.25	40.2857	38.5595	133	82.3333	124.25	126.333	116.479
55.286	47.857	44.143	49.0953	74.571	61.7143	61.571	65.9521	28.857	27.857	25.714	27.476	32.7143	32.1429	26.2857	30.381	42.429	34.714	41.714	39.619	126.857	117.714	119.286	121.286	36.429	37.857	41	38.4287	118.286	99.714	115.143	111.048	57.571	53.143	48.714	53.1427	117.571	107.286	92.429	105.762	39.2857	40	39	39.4286	142	85	132.5	144.333	125.958
53	45.714	47.286	48.6667	77.286	63.2857	68	69.5239	29.429	27.571	25	27.3333	30.4286	28.1429	26.4286	28.3334	41.714	31.571	43	38.7617	117.286	105.714	122.571	115.19	35.143	38.143	41	38.0953	113.143	101.429	104	106.191	55.143	51	49.286	51.8097	108	102.714	96	102.238	39.5714	37.25	36.8571	37.8928	143	82	140	129	123.5
55.857	47	50.714	51.1903	76.714	67.8571	73.143	72.5714	29.286	28.143	27.286	28.2383	32.2857	30.8571	28.8571	30.6666	38.429	33.857	41.714	38	117.429	115.286	120.857	117.857	36	41.429	40.143	39.1907	128	123	92.571	114.524	57.714	54.286	53.429	55.143	114.143	111	103.429	109.524	37.8571	35.75	37.4286	37.0119	119	99.3333	119.25	130.667	117.063
51.571	41.571	48.571	47.2377	75.286	61.4286	76	70.9049	29.571	29.714	26.429	28.5713	31.7143	29.7143	30.4286	30.6191	38.286	33	40.143	37.143	128.714	119	116.714	121.476	38.286	41.714	39.286	39.762	121	103.286	94	106.095	56.714	55.429	54.429	55.524	115.286	113.286	100	109.524	37.4286	39.5	39.2857	38.7381	131.333	100.333	113	162	126.667
59.143	47.571	47.714	51.476	90.571	70.5714	79.571	80.2378	27.714	27.143	27.714	27.5237	33.2857	31.7143	29.7143	31.5714	39.429	33.429	38.286	37.048	122	109.286	120.714	117.333	39.571	42.286	39.286	40.381	120.714	105.143	101.143	109	50.143	55.571	54.857	53.5237	96	107	100.429	101.143	37.4286	35.5	37.4286	36.7857	168	111	132	161.333	143.083
56.714	49.143	46.857	50.9047	80.857	77.1429	77.714	78.5713	31.714	31.714	29	30.8093	35.2857	33	33.4286	33.9048	39	36	39.143	38.0477	117.429	118.857	117.286	117.857	39.286	40.143	40.714	40.0477	117.571	109.286	97.571	108.143	53.429	63	54.714	57.0477	108.429	124.143	100.857	111.143	37.7143	42.25	36.1429	38.7024	163.333	99.3333	109	176	136.917
67.429	49.571	48.143	55.0477	93.429	76.8571	81.143	83.8097	33.571	32.571	31.286	32.476	39.2857	37.4286	37.1429	37.9524	39.286	39	42.714	40.3333	127.714	118	117.714	121.143	42.857	40.714	42.286	41.9523	117.286	116.571	99.143	111	63.571	58	54.714	58.7617	131.143	106.571	98.143	111.952	37.1429	49.75	36.4286	41.1072	176	92.6667	128.75	147.333	136.187
68.143	55.571	55.571	59.7617	96.143	82.8571	89.857	89.619	35.571	34.286	34.429	34.762	41.1429	38.2857	39.2857	39.5714	38.571	40.286	45.143	41.3333	115.429	121.857	118.143	118.476	43	42.429	43.143	42.8573	112	125.429	113	116.81	58.143	53	60.429	57.1907	107.571	89.429	105.143	100.714	40.1429	45	37.4286	40.8572	148.333	89	156.75	126	130.021
73.571	56.143	56.286	62	100.571	84.4286	94.286	93.0952	32.571	31.714	36.143	33.476	36.5714	33.5714	39	36.3809	42.857	46.143	45.714	44.9047	117.286	117	120	118.095	47	43.429	43.571	44.6667	114.857	125.143	123.286	121.095	51.429	57.143	64	57.524	86.714	93.714	103.571	94.6663	38.7143	52.5	36.5714	42.5952	119.667	75.6667	119.75	165	120.021
71.429	57.143	62.571	63.7143	90.857	87.1429	96.571	91.5236	38.857	39.286	36.143	38.0953	34.1429	32.7143	36.7143	34.5238	44.571	52.286	48.429	48.4287	120.571	109.143	118.857	116.19	52.143	49.714	44	48.619	108.714	111.714	111.143	110.524	63	59	65.714	62.5713	107	88	98.857	97.9523	39	57	38	44.6667	129.333	90.6667	150.5	167.333	134.458
73.143	59.714	67.571	66.8093	98.857	85.8571	100.429	95.0477	47	44.286	42.429	44.5717	42.2857	42.5714	35.8571	40.2381	44	61.143	54.286	53.143	121.714	123.143	128.571	124.476	62.857	54.286	47.714	54.9523	101.857	102	111.143	105	66	62.714	71.286	66.6667	101.857	91.286	100.571	97.9047	38.5714	48.25	37.5714	41.4643	141.667	90.3333	152.25	115	124.813
81.143	61.143	67	69.762	110.286	86	91.286	95.8573	54	49.857	47.714	50.5237	43.2857	41.4286	42.8571	42.5238	46.571	71.857	62	60.1427	123.714	114.286	118.714	118.905	76.429	71.571	57.143	68.381	97.429	104.714	112.429	104.857	69	66.143	74.857	70	100.571	93.857	102.429	98.9523	40.8571	56.5	43	46.7857	131.333	96.3333	98	118.667	111.083
93.286	70	78.286	80.524	113.429	96.8571	99.571	103.286	54.857	51.571	53.429	53.2857	50.1429	47	48.1429	48.4286	58.571	85	72.714	72.095	127	107.429	117.571	117.333	96.714	79.714	65.857	80.7617	97.429	87.857	120.429	101.905	81.571	70.286	80.143	77.3333	116.857	88.571	107.286	104.238	46.2857	65.5	43.7143	51.8333	135.667	86.3333	126	135.333	120.833
96.714	80.286	79	85.3333	113.857	98.5714	94.857	102.428	69.714	64.143	67.143	67	42.7143	42.4286	45.1429	43.4286	73	111	87.429	90.4763	133.286	117.143	108.714	119.714	112	83.143	80.857	92	100.714	88.143	125.571	104.809	86.143	76.857	91.429	84.8097	98.857	86.286	103.857	96.3333	45.2857	64.75	51.2857	53.7738	108.333	73.3333	148.75	144.333	118.687
116	83.286	96.286	98.524	121	91.5714	101.286	104.619	84	75.286	74.857	78.0477	55.4286	54	48.7143	52.7143	77.571	120.143	99.714	99.1427	105.286	108.857	97.143	103.762	133.571	95.429	99.571	109.524	86.714	85.143	105.143	92.3333	98.714	91.143	91.286	93.7143	98.429	91	81.714	90.381	56.7143	72.25	56	61.6548	87	62	125	147.667	105.417
121.143	97	102.571	106.905	118	99.5714	94.714	104.095	91.143	83.857	80.714	85.238	43.8571	40.7143	50	44.8571	88.286	124.429	122.429	111.715	105.571	87	93.571	95.3807	148.286	119.429	117.429	128.381	74.286	88.857	84.857	82.6667	113.429	103.429	103.571	106.81	90.286	82.714	80	84.3333	55.5714	78.25	57.5714	63.7976	111	72.6667	144	148.333	119
141.714	115.286	127	128	116.714	94	94.286	101.667	110.143	109.857	95.714	105.238	46	47.8571	46.7143	46.8571	108.143	130.857	137.429	125.476	102.143	77	78.857	86	164.286	144.286	130.286	146.286	74.714	80	76.429	77.0477	122.571	114.571	117	118.047	71.571	73.571	71.857	72.333	63.2857	79.5	58.8571	67.2143	126.667	89.6667	151	143.667	127.75
170	120.143	132.571	140.905	110	83.4286	83.429	92.2859	127.571	126	126.429	126.667	44	45.5714	48.1429	45.9048	128.286	143.857	135.714	135.952	90.286	74.429	65.286	76.667	174.429	159.571	160.571	164.857	69.571	73.571	83.571	75.571	145.857	129.714	129.286	134.952	65.714	64.857	64.714	65.095	70.7143	94.75	65.8571	77.1071	136.333	95	131	128	122.583
178.286	137.286	149.571	155.048	92.714	71.5714	76	80.0951	138	141.286	128.286	135.857	45.4286	45.4286	53.8571	48.2381	144.429	161.714	156.857	154.333	76.714	66.143	62.857	68.5713	188.571	167.429	167.429	174.476	65.714	68	68.857	67.5237	161.143	135	154.714	150.286	57.286	53.714	62.714	57.9047	80.1429	88.75	71.5714	80.1548	115.667	99.6667	150.5	126.667	123.125
190.429	145.429	148.714	161.524	80.429	64.1429	64.143	69.5716	136.429	136.857	131.143	134.81	43.7143	45.2857	45.2857	44.7619	150.429	173.571	133.857	152.619	68.571	64.429	50	61	177.286	178.143	177.714	177.714	60.143	63.286	64.857	62.762	157	142.286	165.571	154.952	48.714	45.571	52.429	48.9047	88.1429	96	83	89.0476	100	72.3333	124.5	154.333	112.792
186.714	147.571	136	156.762	71.571	59.4286	54.857	61.9522	115.857	121.286	116.857	118	43.1429	42.5714	44.4286	43.381	162.571	158.429	94.571	138.524	61.286	66.571	44.571	57.476	156.143	181.143	185.857	174.381	50	61.714	59.143	56.9523	149	139.571	149.857	146.143	41.429	43	42.286	42.2383	91.4286	104	98.1429	97.8572	139	73	134.25	130.333	119.146
178.571	126.286	133.857	146.238	69.429	53.1429	55.286	59.286	63.857	75	107	81.9523	38.1429	38.8571	39.4286	38.8095	137.429	81.429	60.286	93.048	52.571	51.857	37.286	47.238	107.857	173	201.714	160.857	37	55.714	59.143	50.619	107	114.286	117.857	113.048	30.857	34.429	34	33.0953	93.8571	92.75	87	91.2024	165	75.6667	133	112	121.417
111.571	85	80.857	92.476	50.429	40	41.143	43.8573	38.857	43.429	85.714	56	24	26.7143	36.7143	29.1429	81	36.571	44	53.857	42.286	40.714	32.429	38.4763	47.429	119.429	152.286	106.381	24.286	40.714	47.143	37.381	73.286	76.429	81.286	77.0003	23.571	23.429	24.571	23.857	81.5714	74	61.4286	72.3333	138	66.6667	105.25	88	99.4792
65.143	54.714	50.857	56.9047	39.714	33.1429	32.714	35.1903	30.429	32	40.143	34.1907	19.4286	20	30.2857	23.2381	49.429	29.857	40.286	39.8573	33.429	41	28.143	34.1907	33	55.143	62.429	50.1907	20	28.286	29.571	25.9523	60.429	51.571	52.857	54.9523	22.143	18.143	18	19.4287	62	57.25	44.5714	54.6071	113.333	78.3333	75.5	55.667	80.7083
55.286	48.571	53.143	52.3333	38.143	31.2857	34.143	34.5239	31.143	31.857	28.571	30.5237	16.8571	17.2857	18	17.3809	44	26.857	42	37.619	33.857	44.714	28.857	35.8093	36	31.429	34.714	34.0477	21.857	22.286	22.714	22.2857	54.571	41.286	46	47.2857	20.857	16.857	18.143	18.619	47.4286	47.5	46.5714	47.1667	68.667	67.6667	62.25	40.333	59.7292
55.429	50	52.857	52.762	35	31.2857	33.286	33.1906	31	32.143	32.571	31.9047	17.7143	17.2857	15.2857	16.7619	39	26.286	41.143	35.4763	29.286	44.571	26.714	33.5237	36.286	32.857	33.714	34.2857	21.857	21.143	20.429	21.143	53.286	38.429	42.714	44.8097	21.429	16.429	17.571	18.4763	38.8571	38.5	48.1429	41.8333	43	52.3333	47.75	37.333	45.1041
59	56.857	52.714	56.1903	38.143	32.7143	33.143	34.6668	31	31.429	40.571	34.3333	14.7143	14.8571	17.5714	15.7143	38	22.571	43.714	34.7617	28.429	33.857	26.571	29.619	35.714	31	34.857	33.857	21.429	19	24.143	21.524	58.857	36.857	45.571	47.095	23.857	17.286	19.857	20.3333	40.2857	37	49.4286	42.2381	40.667	37.6667	40	40.667	39.7502
58.143	54.429	48.286	53.6193	37	30.8571	29.571	32.476	35.571	35	37.286	35.9523	16	16	21.4286	17.8095	37.286	22.143	43.286	34.2383	27	29.429	26.429	27.6193	36.143	31.714	33.714	33.857	22.571	19.571	23.571	21.9043	59	39.714	47.429	48.7143	24.143	19.143	20.143	21.143	44.4286	38.25	47	43.2262	41.667	34.3333	42.75	42	40.1876
63	59.857	55.286	59.381	38.143	33.7143	32.857	34.9048	35	35.714	38.714	36.476	17.4286	16.8571	19.1429	17.8095	35.571	23.143	44	34.238	26.571	30.429	27.143	28.0477	35.857	32.714	32.714	33.7617	23.714	22.857	22.286	22.9523	63.143	42.286	48.571	51.3333	24	19.143	20.286	21.143	48.4286	40.75	42.8571	44.0119	41	42.3333	41.5	42.667	41.8751
64.571	59.714	46.714	56.9997	38.571	34.4286	31.429	34.8095	39.571	39.286	38.714	39.1903	17.7143	16.8571	19.2857	17.9524	31.571	22.286	38.857	30.9047	26.857	27	23	25.619	34.857	34.429	31.286	33.524	22.714	23	22.714	22.8093	63.714	47.571	52	54.4283	23.714	20.286	22	22	53.2857	39.5	40.5714	44.4524	36	37	39	42.333	38.5832
68.286	56.571	48.571	57.8093	40.429	32	33.286	35.2383	40.143	40	40.429	40.1907	19.2857	18.2857	22.5714	20.0476	31.857	25.571	37.714	31.714	25.143	26.143	23	24.762	34.714	33.286	33.143	33.7143	21.429	21	23.857	22.0953	21.143	48	51.571	40.238	7.714	20.714	21.429	16.619	55.8571	46.25	40.4286	47.5119	45	36	36.25	46.667	40.9793
67.571	55.857	46.714	56.714	39.571	33.1429	31	34.5713	37.857	36.429	40.143	38.143	18.4286	17.8571	20.5714	18.9524	30.286	25.857	41.143	32.4287	23.143	26	22.429	23.8573	33.857	31.286	31.857	32.3333	20.571	23	24	22.5237	0	39.857	48.714	29.5237	0	17.286	20.429	12.5717	52.2857	55.25	42.4286	49.9881	44.333	35.6667	45.25	49.333	43.6457
69	56.714	48.714	58.1427	39.143	32.1429	33.714	35	36	36.429	38.857	37.0953	18.1429	17.5714	19.5714	18.4286	29.143	29	35.143	31.0953	22	26	18.571	22.1903	33.429	33.571	30.714	32.5713	20.286	23.286	25.714	23.0953	0	13.714	43	18.9047	0	6	18.429	8.143	50.8571	52.25	44.5714	49.2262	47.667	42	57.5	51	49.5418
67.571	56.143	44.571	56.095	39.286	32.1429	29.429	33.6193	35.143	35.714	45.286	38.7143	19.4286	19.7143	0	13.0476	30.429	29.857	30	30.0953	19.857	25.571	15.571	20.333	32.571	32.857	29.143	31.5237	20.571	20.714	25	22.095	0	0.429	27.429	9.286	0	0.143	11.857	4	54.8571	57.5	37.8571	50.0714	47.333	46.6667	51.75	50.333	49.0207
57.714	56.143	48	53.9523	37.429	33.2857	32	34.2382	36.857	37.571	0	24.8093	17.7143	18.1429	0	11.9524	25.714	27.571	31.286	28.1903	16	25.857	15.857	19.238	31.429	28.429	27.571	29.143	20.429	18	25.286	21.2383	0	0	4.429	1.47633	0	0	1.714	0.571333	53	59	34.8571	48.9524	44	44.3333	55	46	47.3333
55	46.714	45.286	49	34.286	27.4286	29.571	30.4285	48.286	49.286	0	32.524	0	0	0	0	27	28.571	27.429	27.6667	16.143	24.143	15.286	18.524	32.571	28.714	22.571	27.952	21.429	20	15.571	19	0	0	0	0	0	0	0	0	45.7143	56.75	33.2857	45.25	57.333	40.3333	56.25	52.333	51.5623
56	39.714	41.714	45.8093	35.429	24.8571	28	29.4287	0	0	0	0	0	0	0	0	29.571	29.143	23.714	27.476	16.857	23.857	12.429	17.7143	28.286	27.571	0	18.619	18	20.857	0	12.9523	0	0	0	0	0	0	0	0	48.1429	54.25	34.4286	45.6072	54	37.6667	50.5	47.667	47.4584
52.714	43.571	45.857	47.3807	33.286	26.2857	29	29.5239	0	0	0	0	0	0	0	0	25.143	29	21.857	25.3333	15.571	23.714	10.286	16.5237	21.429	27	0	16.143	12.429	18.143	0	10.1907	0	0	0	0	0	0	0	0	49.8571	59	35.1429	48	49.333	39	48.25	50	46.6457
55.714	45.286	41.286	47.4287	34.714	28.4286	27.286	30.1429	0	0	0	0	0	0	0	0	20.143	26.143	30.571	25.619	12.143	23.857	7.286	14.4287	0	28.714	0	9.57133	0	18.857	0	6.28567	0	0	0	0	0	0	0	0	48.5714	62.75	36.2857	49.2024	53.667	39.3333	54.25	53.667	50.2293
53.857	50	46.571	50.1427	35.714	29.5714	29.286	31.5238	0	0	0	0	0	0	0	0	23.286	26.857	27.571	25.9047	12	20	3.571	11.857	0	27	0	9	0	19.286	0	6.42867	0	0	0	0	0	0	0	0	45.1429	59.25	35.1429	46.5119	57.333	38.3333	54.5	47	49.2916
51.857	51.286	45.571	49.5713	34.857	28.8571	28.429	30.7144	0	0	0	0	0	0	0	0	26.714	26.714	16.571	23.333	11.714	19.429	0.857	10.6667	0	25.286	0	8.42867	0	19.143	0	6.381	0	0	0	0	0	0	0	0	41	50.25	31.8571	41.0357	57.667	39	48.5	42	46.7918
55.286	48.571	42.286	48.7143	34.857	28.4286	27	30.0952	0	0	0	0	0	0	0	0	36.571	24.429	2.429	21.143	9.286	18.571	0	9.28567	0	15	0	5	0	10.714	0	3.57133	0	0	0	0	0	0	0	0	35.1429	45.25	30	36.7976	56	34.6667	46.75	42.667	45.0209
53.857	50	41.857	48.5713	34	29.8571	26.286	30.0477	0	0	0	0	0	0	0	0	28.571	22.714	0	17.095	5.143	17.429	0	7.524	0	0	0	0	0	0	0	0	0	0	0	0	0	0	0	0	25.7143	44.75	29.4286	33.2976	54	35.3333	43	42.333	43.6666
46.286	50.714	41.143	46.0477	31.143	30.7143	25.714	29.1904	0	0	0	0	0	0	0	0	17.857	21.143	0	13	2	15.429	0	5.80967	0	0	0	0	0	0	0	0	0	0	0	0	0	0	0	0	17.2857	44	29.8571	30.3809	52	34.3333	44.5	37.667	42.1251
47.571	43.714	42.571	44.6187	29.857	28.1429	26	28	0	0	0	0	0	0	0	0	6.429	22.143	0	9.524	0	13.714	0	4.57133	0	0	0	0	0	0	0	0	0	0	0	0	0	0	0	0	11.2857	48.75	30.5714	30.2024	45	35.3333	42.25	40.333	40.7291
36.857	42.143	36.571	38.5237	22.429	25.4286	23.857	23.9049	0	0	0	0	0	0	0	0	0	20.714	0	6.90467	0	13.286	0	4.42867	0	0	0	0	0	0	0	0	0	0	0	0	0	0	0	0	5.7143	51.5	30	29.0714	42.333	31	41.75	45.333	40.104
24.286	40.714	38.571	34.5237	12.857	25.5714	23.571	20.6665	0	0	0	0	0	0	0	0	0	18.857	0	6.28567	0	12.571	0	4.19033	0	0	0	0	0	0	0	0	0	0	0	0	0	0	0	0	1	48.75	31	26.9167	47.333	31.6667	44.25	47.667	42.7292
13.143	37.143	39.286	29.8573	7	22.2857	21.429	16.9049	0	0	0	0	0	0	0	0	0	18.286	0	6.09533	0	9.714	0	3.238	0	0	0	0	0	0	0	0	0	0	0	0	0	0	0	0	0	42.75	32.4286	25.0595	44.667	35.6667	43.75	38.667	40.6877
2.143	38.571	39.429	26.7143	0.857	22.4286	21.714	14.9999	0	0	0	0	0	0	0	0	0	16	0	5.33333	0	10	0	3.33333	0	0	0	0	0	0	0	0	0	0	0	0	0	0	0	0	0	38.75	0	12.9167	37.333	36.3333	37.75	34.333	36.4373
0	37.429	40.143	25.8573	0	23.7143	23	15.5714	0	0	0	0	0	0	0	0	0	14	0	4.66667	0	8.429	0	2.80967	0	0	0	0	0	0	0	0	0	0	0	0	0	0	0	0	0	43.25	0	14.4167	32.667	34	34.25	9.667	27.646
0	36.714	41.714	26.1427	0	22.7143	23	15.2381	0	0	0	0	0	0	0	0	0	14.429	0	4.80967	0	8.571	0	2.857	0	0	0	0	0	0	0	0	0	0	0	0	0	0	0	0	0	35	0	11.6667	43.333	35	38.5	0	29.2082
0	36.857	39.714	25.5237	0	22.4286	22.286	14.9049	0	0	0	0	0	0	0	0	0	14.857	0	4.95233	0	7.143	0	2.381	0	0	0	0	0	0	0	0	0	0	0	0	0	0	0	0	0	11.25	0	3.75	44	35	31	0	27.5
0	31.857	41.429	24.4287	0	20.1429	23.143	14.4286	0	0	0	0	0	0	0	0	0	19.429	0	6.47633	0	7.714	0	2.57133	0	0	0	0	0	0	0	0	0	0	0	0	0	0	0	0	0	0	0	0	48.333	34.6667	9.5	0	23.1249
0	32.714	34.429	22.381	0	19	20.286	13.0953	0	0	0	0	0	0	0	0	0	25.286	0	8.42867	0	4.571	0	1.52367	0	0	0	0	0	0	0	0	0	0	0	0	0	0	0	0	0		0	0	47.333	37.6667	0	0	21.2499
0	35.857	39	24.9523	0	21.2857	23.286	14.8572	0	0	0	0	0	0	0	0	0	17.286	0	5.762	0	2	0	0.666667	0	0	0	0	0	0	0	0	0	0	0	0	0	0	0	0	0		0	0		33.3333		0	16.6667
0	32.857	36.714	23.1903	0	20.8571	21.714	14.1904	0	0	0	0	0	0	0	0	0	11.429	0	3.80967	0	0.286	0	0.0953333	0	0	0	0	0	0	0	0	0	0	0	0	0	0	0	0	0		0	0		33.6667		0	16.8333
0	34.714	33.571	22.7617	0	20.5714	19.714	13.4285	0	0	0	0	0	0	0	0	0	2.143	0	0.714333	0	0	0	0	0	0	0	0	0	0	0	0	0	0	0	0	0	0	0	0	0		0	0		30.6667			30.6667
0	38.714	37.143	25.2857	0	22.7143	20.429	14.3811	0	0	0	0	0	0	0	0	0	0	0	0	0	0	0	0	0	0	0	0	0	0	0	0	0	0	0	0	0	0	0	0	0		0	0		30.3333			30.3333
0	48	35.429	27.8097	0	25.5714	19	14.8571	0	0	0	0	0	0	0	0	0	0	0	0	0	0	0	0	0	0	0	0	0	0	0	0	0	0	0	0	0	0	0	0	0		0	0		32.6667			32.6667
0	51.143	28.714	26.619	0	26.2857	15.857	14.0476	0	0	0	0	0	0	0	0	0	0	0	0	0	0	0	0	0	0	0	0	0	0	0	0	0	0	0	0	0	0	0	0	0		0	0		32			32
0	47	23.571	23.5237	0	24	10	11.3333	0	0	0	0	0	0	0	0	0	0	0	0	0	0	0	0	0	0	0	0	0	0	0	0	0	0	0	0	0	0	0	0	0		0	0		31.3333			31.3333
0	50.429	12.286	20.905	0	29.1429	5	11.381	0	0	0	0	0	0	0	0	0	0	0	0	0	0	0	0	0	0	0	0	0	0	0	0	0	0	0	0	0	0	0	0	0		0	0		32			32
0	48.429	1	16.4763	0	25	0.286	8.42867	0	0	0	0	0	0	0	0	0	0	0	0	0	0	0	0	0	0	0	0	0	0	0	0	0	0	0	0	0	0	0	0	0		0	0					#DIV/0!
0	35.429	0	11.8097	0	16.4286	0	5.4762	0	0	0	0	0	0	0	0	0	0	0	0	0	0	0	0	0	0	0	0	0	0	0	0	0	0	0	0	0	0	0	0	0		0	0
0	17.857	0	5.95233	0	8.1429	0	2.7143	0	0	0	0	0	0	0	0	0	0	0	0	0	0	0	0	0	0	0	0	0	0	0	0	0	0	0	0	0	0	0	0	0		0	0
0	6.286	0	2.09533	0	2.1429	0	0.7143	0	0	0	0	0	0	0	0	0	0	0	0	0	0	0	0	0	0	0	0	0	0	0	0	0	0	0	0	0	0	0	0	0		0	0
