# Supplementary material for: Drosophila hedgehog can act as a morphogen in the absence of regulated Ci processing
Source: eLife. 2020 Oct 21;9:e61083. doi: 10.7554/eLife.61083 (PMC7679133; doi:10.7554/eLife.61083)
Supplement: Figure 4—source data 1. [file elife-61083-fig4-data1.xlsx]

## Sheet: J
J
	crCi-WT	crCi-S849A	crCi-∆1270-1370	gCi-WT	gCi-S849A
ptc-lacZ	0.452279	0.94281	1.19164	0.137608	0.8956
Space	0	0	0	0	0
Clone Ci-155	0.850337	0.891682	0.611233	0.780344	1.07084
Anterior Ci-155	0.346879	2.61929	1.32866	0.419597	2.7438
plz SE	0.0409148	0.0607448	0.224704	0.024172	0.0831429
Clone SE	0.0758307	0.075647	0.0621764	0.0811985	0.0926229
Anterior SE	0.0374062	0.125506	0.170032	0.0304653	0.300811
P-Value ptc		P < 0.0001	P = 0.0007	P < 0.0001	0.0001
P-Value Ciclone		P = 0.6695	P = 0.0156	P = 0.4597	P = 0.0251
P-Value CiCi-ant		P < 0.0001	P < 0.0001	P = 0.1005	P < 0.0001
						Ci-155
ptc-lacZ						Clone	Anterior	Clone	Anterior	Clone	Anterior	Clone	Anterior	Clone	Anterior
crCi-S849A	crCi-∆1270-1370	crCi-WT	gCi-S849A	gCi-WT		crCi-S849A	crCi-S849A	crCi-∆1270-1370	crCi-∆1270-1370	crCi-WT	crCi-WT	gCi-S849A	gCi-S849A	gCi-WT	gCi-WT
0.954009	1.68455	0.325516	1.02431	0.187109		1.02604	2.58959	0.794823	1.5147	0.573312	0.299256	1.26902	1.99811	0.698961	0.343367
0.967682	1.92763	0.422128	0.786895	0.187732		0.962012	2.9705	0.779501	1.55309	0.867366	0.266245	0.760423	2.20932	0.771001	0.407896
0.926325	1.14501	0.588141	1.14681	0.167383		0.683047	2.63471	0.626719	1.88721	0.660973	0.272094	1.24369	3.4097	0.648209	0.369759
0.742504	0.717964	0.398815	0.830627	0.132453		1.04844	2.19217	0.515176	0.924906	1.01829	0.378039	1.19368	2.20603	1.1054	0.414348
1.12353	0.831077	0.433706	0.689347	0.0979852		0.738875	2.7095	0.537607	1.08507	0.902917	0.243126	0.79161	2.49374	0.851272	0.443582
	0.843641	0.396666		0.0529836				0.413571	1.007	0.840165	0.436263	1.19295	2.46292	0.607224	0.53863
		0.60098								1.13169	0.463055	1.17262	3.45287
		0.453462								0.883889	0.436364	0.942693	3.71771
		0.511626				Ci-155				0.774437	0.32747
ptc-lacZ						Clone	Anterior	Clone	Anterior	Clone	Anterior	Clone	Anterior	Clone	Anterior
crCi-S849A	crCi-∆1270-1370	crCi-WT	gCi-S849A	gCi-WT		crCi-S849A	crCi-S849A	crCi-∆1270-1370	crCi-∆1270-1370	crCi-WT	crCi-WT	gCi-S849A	gCi-S849A	gCi-WT	gCi-WT
0.94281	1.19164	0.452279	0.8956	0.137608	0	0.891682	2.61929	0.611233	1.32866	0.850337	0.346879	1.07084	2.7438	0.780344	0.419597
SE	SE	SE	SE	SE	SE	SE	SE	SE	SE	SE	SE	SE	SE
0.0607448	0.224704	0.0409148	0.0831429	0.024172	0	0.075647	0.125506	0.0621764	0.170032	0.0758307	0.0374062	0.0926229	0.300811	0.0811985	0.0304653
0.135829	0.502453	0.0914883	0.185913	0.0540502		0.169152	0.28064	0.152301	0.380204	0.169563	0.0836427	0.207111	0.672634	0.181565	0.0681225

## Sheet: J-raw
2R
crCi-Wt	Jamie (10-28-19)
	ptc															2A1
Disc1	clone 1	clone 2	clone 3	Average	Disc2	clone 4	clone 5	clone 6		Disc3	clone 4	clone 5	clone 6			Disc 1	clone 1	clone 2	clone 3	Average	Disc 2	clone 1	clone 2	clone 3	Average	Disc 3	clone 1	clone 2	clone 3	Average
clone	1138.03	1295.58	1566.29		clone	792.616	831.417	790.227		clone	929.18	763.68	828.934			clone	1066.46	1308.58	1138.64		clone	797.91	758.215	736.625		clone	1021.11	894.946	839.22
AP Border	2419.26	2114.63	2179.84	2237.91	AP Border	1476.61	1533.79	1373.09	1461.16	AP Border	1277.42	1526.51	1326.6	1376.84		AP Border	1393.3	1519.7	1340.38	1417.79	AP Border	790.211	802.795	781.844	791.617	AP Border	928.262	1074.98	858.948	954.062
Anterior (non clone)	643.381	618.961	559.304	607.215	Anterior (non clone)	386.209	350.794	310.342	349.115	Anterior (non clone)	269.697	260.024	235.101	254.941		Anterior (non clone)	840.807	813.626	818.442		Anterior (non clone)	577.63	531.213	597.662		Anterior (non clone)	680.684	667.095	611.653
Ratio	0.325516	0.422128	0.588141		Ratio	0.398815	0.433706	0.396666		Ratio	0.60098	0.453462	0.511626			Posterior	599.874	616.952	566.381	594.402	Posterior	467.05	448.597	427.048	447.565	Posterior	447.405	469.111	418.262	444.926
																clone/AP	0.573312	0.867366	0.660973		clone/AP	1.01829	0.902917	0.840165		clone/AP	1.13169	0.883889	0.774437
																Anterior/AP	0.299256	0.266245	0.272094		Anterior/AP	0.378039	0.243126	0.436263		Anterior/AP	0.463055	0.436364	0.32747
2R	Jamie (8-8-19)
crCi-S849A
	ptc															2A1
Disc1	clone 1	clone 2	clone 3	clone 4	clone 5	Average										Disc 1	clone 1	clone 2	clone 3	clone 4	clone 5	Average
clone	1862.63	1879.6	1828.26	1600.08	2073.07											clone	1480.96	1436.32	1241.8	1496.59	1280.73
AP Border	1848.12	2026.12	1884.92			1919.72										AP Border	1650.13	1184.89	1553.41			1462.81
Anterior (non clone)	626.995	656.664	751.405			678.355										Anterior (non clone)	2571.21	2836.8	2602.67	2294.09	2654.82
Ratio	0.954009	0.967682	0.926325	0.742504	1.12353											Posterior	866.955	835.819	593.799			765.524
																clone/AP	1.02604	0.962012	0.683047	1.04844	0.738875
																Anterior/AP	2.58959	2.9705	2.63471	2.19217	2.7095
crCi-∆1270-1370
	ptc					ptc										2A1
Disc1	clone 1	clone 2	clone 3	Average	Disc 2	clone 1	clone 2	clone 3	Average							Disc 1	clone 1	clone 2	clone 3	Average	Disc 2	clone 1	clone 2	clone 3	Average
clone	156.508	174.887	115.714		clone	80.208	89.679	90.731								clone	99.752	98.771	88.989		clone	37.116	37.807	33.986
AP Border	105.795	114.246	94.21	104.75	AP Border	106.976	99.847	104.646	103.823							AP Border	115.46	118.247	104.959	112.889	AP Border	54.625	58.062	43.467	52.0513
Anterior (non clone)	32.34	23.214	31.872	29.142	Anterior (non clone)	22.335	19.977	17.966	20.0927							Anterior (non clone)	145.843	148.301	169.693		Anterior (non clone)	49.738	52.267	54.672
Ratio	1.68455	1.92763	1.14501		Ratio	0.717964	0.831077	0.843641								Clone	Anterior	Clone	Anterior	Clone	Anterior	Clone	Anterior	Clone	Anterior
																crCi-S849A	crCi-S849A	crCi-∆1270-1370	crCi-∆1270-1370	crCi-WT	crCi-WT	gCi-S849A	gCi-S849A	gCi-WT	gCi-WT
																1.02604	2.58959	0.794823	1.5147	0.573312	0.299256	1.26902	1.99811	0.698961	0.343367
gCi-WT																0.962012	2.9705	0.779501	1.55309	0.867366	0.266245	0.760423	2.20932	0.771001	0.407896
	ptc					ptc										0.683047	2.63471	0.626719	1.88721	0.660973	0.272094	1.24369	3.4097	0.648209	0.369759
Disc1	clone 1	clone 2	clone 3	Average	Disc 2	clone 1	clone 2	clone 3	Average							1.04844	2.19217	0.515176	0.924906	1.01829	0.378039	1.19368	2.20603	1.1054	0.414348
clone	51.132	51.215	48.507		clone	31.183	28.297	24.529								0.738875	2.7095	0.537607	1.08507	0.902917	0.243126	0.79161	2.49374	0.851272	0.443582
AP Border	174.289	146.434	157.202	159.308	AP Border	100.041	89.888	71.686	87.205									0.413571	1.007	0.840165	0.436263	1.19295	2.46292	0.607224	0.53863
Anterior (non clone)	23.718	31.076	23.903	26.2323	Anterior (non clone)	12.928	12.71	12.65	12.7627											1.13169	0.463055	1.17262	3.45287
Ratio	0.187109	0.187732	0.167383		Ratio	0.132453	0.0979852	0.0529836												0.883889	0.436364	0.942693	3.71771
																clone/AP	-41.7526	7.91964	-4.60113		clone/AP	1.46967	4.62978	1.58044
																Anterior/AP	20.215	20.215	20.215		Anterior/AP	2.17704	6.41048	0
gCi-S849A
	ptc					ptc										2A1
Disc1	clone 1	clone 2	clone 3	Average	Disc 2	clone 1	clone 2	clone 3	clone 4	clone 5						Disc 1	clone 1	clone 2	clone 3	Average	Disc 2	clone 1	clone 2	clone 3	clone 4	clone 5	Average
clone	140.203	129.661	158.174		clone	145.478	121.395	157.904	125.831	111.5						clone	62.933	48.839	62.231		clone	64.446	51.789	64.423	63.783	56.545
AP Border	150.418	115.961	86.439	117.606	AP Border	140.646	144.065	136.33	140.125	153.892	143.012					AP Border	56.277	59.393	50.764	55.478	AP Border	52.133	59.434	62.959	62.858	54.361	58.349
Anterior (non clone)	49.473	49.636	45.308	48.139	Anterior (non clone)	42.052	34.543	39.986	44.865	46.429	41.575					Anterior (non clone)	83.137	88.99	122.254		Anterior (non clone)	96.314	105.371	104.401	135.564	143.901
Ratio	1.32529	1.17354	1.58399		Ratio	1.02431	0.786895	1.14681	0.830627	0.689347						Posterior	29.311	25.675	28.314	27.7667	Posterior	27.506	24.361	30.466	25.524	26.491	26.8696
																clone/AP	1.26902	0.760423	1.24369		clone/AP	1.19368	0.79161	1.19295	1.17262	0.942693
																Anterior/AP	1.99811	2.20932	3.4097		Anterior/AP	2.20603	2.49374	2.46292	3.45287	3.71771

## Sheet: K
plz						Ci-155
2b						Clone	Anterior	Clone	Anterior	Clone	Anterior	Clone	Anterior
crCi-S849A	crCi-P(1-3)A	crCi-∆760-934	crCi-∆1270-1370	crCi-Wt		crCi-S849A	crCi-S849A	crCi-P(1-3)A	crCi-P(1-3)A	crCi-∆1270-1370	crCi-∆1270-1370	crCi-WT	crCi-WT
0.819614	1.0748	1.12536	2.29093	0.660459		0.951125	3.36972	1.25369	2.27	0.862388	1.55944	0.736328	0.531006
0.96195	0.888235	0.829057	1.84113	0.446655		1.03317	3.38032	1.3687	2.27822	0.80173	1.41942	0.659261	0.624724
0.997219	1.15287	0.695025	1.53124	0.3446		0.872216	3.40941	1.33891	2.29145	0.50944	0.812441	0.551926	0.52392
0.971516	0.661909	0.868677	1.79314	0.555116		1.29713	2.77314	1.64367	3.81808	1.8389	1.923	0.590066	0.486412
1.07261	1.2513	0.707389	1.85755	0.491661		1.09436	3.1943	2.43533	3.80763	1.30619	1.87092	0.535818	0.47433
0.725693	0.615202	1.01726	1.21841	0.636788		0.83827	3.50354	0.808512	3.59564	1.0848	1.15974	0.67401	0.667001
1.54278	1.18937			0.473968		1.16856	2.26632	2.20745	2.66339			0.761325	0.58017
0.967695	1.36299			0.697955		0.865307	2.42814	1.08229	2.57943			0.682058	0.599629
				0.463275								0.726741	0.636164
ptc-lacZ						Clone	Anterior	Clone	Anterior	Clone	Anterior	Clone	Anterior
crCi-S849A	crCi-P(1-3)A	crCi-∆760-934	crCi-∆1270-1370	crCi-Wt		crCi-S849A	crCi-S849A	crCi-P(1-3)A	crCi-P(1-3)A	crCi-∆1270-1370	crCi-∆1270-1370	crCi-WT	crCi-WT
1.00738	1.02459	0.873795	1.7554	0.530053	0	1.01502	3.04061	1.51732	2.91298	1.06724	1.45749	0.657504	0.569262
SE	SE	SE	SE	SE	SE	SE	SE	SE	SE	SE	SE	SE	SE
0.0856214	0.0972637	0.069653	0.146584	0.038666	0	0.057928	0.171331	0.195944	0.248633	0.189426	0.173609	0.0271739	0.0228345
0.242174	0.275103	0.170614	0.359056	0.115998		0.163845	0.484596	0.554214	0.703239	0.463998	0.425255	0.0815218	0.0685035
							2b
								crCi-WT	crCi-S849A	crCi-P(1-3)A	crCi-∆1270-1370	crCi-∆760-934
							ptc-lacZ	0.530053	1.00738	1.02459	1.7554	0.873795
							Space	0	0	0	0	0
							Clone Ci-155	0.657504	1.01502	1.51732	1.06724
							Anterior Ci-155	0.569262	3.04061	2.91298	1.45749
							plz SE	0.038666	0.0856214	0.0972637	0.146584	0.069653
							Clone SE	0.0271739	0.057928	0.195944	0.189426
							Anterior SE	0.0228345	0.171331	0.248633	0.173609
							P-Value ptc		P = 0.0001	P = 0.0001	P < 0.0001	P = 0.0004
							P-Value Ciclone		P < 0.0001	P = 0.0003	P = 0.0205
							P-Value Cianter		P < 0.0001	P < 0.0001	P < 0.0001

## Sheet: K-raw
2b
crCi-Wt	(Amanda 4-27-18) Jamie (5-16-19)			4-30-18
	ptc															2A1
Disc1	clone 1	clone 2	clone 3	Average	Disc2	clone 1	clone 2	clone 3	Average	Disc 3	clone 1	clone 2	clone 6	Average		Disc 1	clone 1	clone 2	clone 3		Disc 2	clone 1	clone 2	clone 3		Disc 3	clone 1	clone 2	clone 3
clone	27211.2	22585.1	20376.9		clone	26187.7	23558.9	26699		clone	94.945	115.766	93.951			clone	23025.3	21433.7	19216.9		clone	23255.8	22066.2	25096.5		clone	89.867	83.651	87.155
AP Border	36915.5	35204	31554.3	34557.9	AP Border	36511.2	39397	35405.6	37104.6	AP Border	152.99	141.3	137.239	143.843		AP Border	33812.3	25706.4	25894.2	28471	AP Border	26672	33825.3	36237.3	32244.9	AP Border	106.855	100.854	118.042	108.584
Anterior (non clone)	12793.2	14118.8	11850.4	12920.8	Anterior (non clone)	11390.6	13579.5	12727.1	12565.7	Anterior (non clone)	51.853	49.357	51.45	50.8867		Anterior (non clone)	18784.8	20720.4	18638.5		Anterior (non clone)	20982.9	20717.9	24942.8		Anterior (non clone)	75.661	77.187	80.052
Ratio	0.660459	0.446655	0.3446		Ratio	0.555116	0.491661	0.636788		Ratio	0.473968	0.697955	0.463275			Posterior	7064.56	7031.81	9357.29	7817.89	Posterior	10167.9	10770.6	10011.9	10316.8	Posterior	30.861	27.263	32.37	30.1647
																clone/AP	0.736328	0.659261	0.551926		clone/AP	0.590066	0.535818	0.67401		clone/AP	0.761325	0.682058	0.726741
2b																Anterior/AP	0.531006	0.624724	0.52392		Anterior/AP	0.486412	0.47433	0.667001		Anterior/AP	0.58017	0.599629	0.636164
crCi-S849A	(Amanda 4-9-18) (Jamie 5-16-19)
	ptc															2A1
Disc 1	clone 1	clone 2	clone 3		Disc2 (giant clone)	clone 1a	clone 1b	clone 1c		Disc3	clone 1	clone 2				Disc 1	clone 1	clone 2	clone 3		Disc 2	clone 1	clone 2	clone 3		Disc 3	clone 1	clone 2
clone	33131.7	36402.2	37212.5		clone	92.862	98.868	78.257		clone	138.966	92.635				clone	12374.5	13006.8	11766.4		clone	52.25	47.328	41.112		clone	38.012	32.568
AP Border	38746	35840.1	37243.2	37276.4	AP Border	97.261	93.914	92.488	94.5543	AP Border	94.475	110.005	102.24			AP Border	14615	14893.4	8744.99	12751.1	AP Border	49.015	45.986	40.112	45.0377	AP Border	32.629	37.343	34.986
Anterior (non clone)	14581.4	13042.5	15274.9	14299.6	Anterior (non clone)	34.145	33.54	37.74	35.1417	Anterior (non clone)	33.719	35.435	34.577			Anterior (non clone)	31013.5	31095.2	31319.4		Anterior (non clone)	88.077	98.3	105.806		Anterior (non clone)	57.719	60.624
Ratio	0.819614	0.96195	0.997219		Ratio	0.971516	1.07261	0.725693		Ratio	1.54278	0.967695				Posterior	4925.41	5082.09	5126.29	5044.59	Posterior	19.997	21.65	20.647	20.7647	Posterior	17.059	17.009	17.034
																clone/AP	0.951125	1.03317	0.872216		clone/AP	1.29713	1.09436	0.83827		clone/AP	1.16856	0.865307
2b																Anterior/AP	3.36972	3.38032	3.40941		Anterior/AP	2.77314	3.1943	3.50354		Anterior/AP	2.26632	2.42814
crCi-P(1-3)A	Amanda (3-14-18)
	ptc															2A1
Disc 1	clone 1	clone 2	clone 3		Disc 2	clone 1	clone 2	clone 3		Disc 3	clone 1	clone 2				Disc 1	clone 1	clone 2	clone 3		Disc 2	clone 1	clone 2	clone 3		Disc 3	clone 1	clone 2
clone	1061.81	941.852	1112		clone	50.883	76.045	48.889		clone	1976.22	2214.8				clone	880.262	934.033	920.105		clone	61.29	77.43	44.263		clone	978.761	648.529
AP Border	958.72	1197.27	885.144	1013.71	AP Border	73.119	53.029	69.802	65.3167	AP Border	2364.68	1358.61	1424.72	1716		AP Border	984.982	564.741	735.246	761.656	AP Border	50.769	48.949	44.783	48.167	AP Border	557.79	615.619	699.721	624.377
Anterior (non clone)	304.837	408.594	398.875	370.769	Anterior (non clone)	21.203	21.382	25.29	22.625	Anterior (non clone)	306.053	362.6	356.947	341.867		Anterior (non clone)	1355.42	1359.26	1365.45		Anterior (non clone)	105.621	105.408	101.086		Anterior (non clone)	1087.93	1112.58	1185.13
Ratio	1.0748	0.888235	1.15287		Ratio	0.661909	1.2513	0.615202		Ratio	1.18937	1.36299				Posterior	317.241	269.904	295.238	294.128	Posterior	27.086	27.117	29.135	27.7793	Posterior	332.176	350.741	309.72	330.879
																clone/AP	1.25369	1.3687	1.33891		clone/AP	1.64367	2.43533	0.808512		clone/AP	2.20745	1.08229
2b																Anterior/AP	2.27	2.27822	2.29145		Anterior/AP	3.81808	3.80763	3.59564		Anterior/AP	2.57943	2.66339
crCi-∆1270-1370	Jamie (10-11-19)
	ptc															2A1
Disc 1	clone 1	clone 2	clone 3		Disc 2	clone 1	clone 2	clone 3								Disc 1	clone 1	clone 2	clone 3		Disc 2	clone 1	clone 2	clone 3
clone	1858.13	1586.78	1399.84		clone	1631.93	1674	1256.55								clone	1541.57	1479.47	1180.25		clone	1130.18	896.265	799.053
AP Border	1228.91	967.346	1041.83	1079.36	AP Border	1043.1	1376.65	921.95	1113.9							AP Border	1757.83	1531.22	1758.27	1682.44	AP Border	666.707	924.969	693.77	761.815
Anterior (non clone)	458.378	475.646	494.274	476.099	Anterior (non clone)	453.356	472.908	456.014	460.759							Anterior (non clone)	2255.14	2111.8	1490.44		Anterior (non clone)	1167.11	1144.24	831.959
Ratio	2.29093	1.84113	1.53124		Ratio	1.79314	1.85755	1.21841								Posterior	629.198	642.093	704.926	658.739	Posterior	346.451	292.63	329.062	322.714
																clone/AP	0.862388	0.80173	0.50944		clone/AP	1.8389	1.30619	1.0848
2b																Anterior/AP	1.55944	1.41942	0.812441		Anterior/AP	1.923	1.87092	1.15974
crCi-∆760-934	ptc	(10-28-19)
Disc 1	clone 1	clone 2	clone 3	Average	Disc 2	clone 1	clone 2	clone 3	Average
clone	1957.43	1620.68	1468.36		clone	1916.92	1676.51	2138.4
AP Border	1686.19	1961.58	1797.1	1814.96	AP Border	1954.8	2055.71	2327.51	2112.67
Anterior (non clone)	637.365	612.128	785.97	678.488	Anterior (non clone)	522.257	683.962	660.05	622.09
Ratio	1.12536	0.829057	0.695025		Ratio	0.868677	0.707389	1.01726
