# Supplementary material for: Drosophila hedgehog can act as a morphogen in the absence of regulated Ci processing
Source: eLife. 2020 Oct 21;9:e61083. doi: 10.7554/eLife.61083 (PMC7679133; doi:10.7554/eLife.61083)
Supplement: Figure 5—source data 1. [file elife-61083-fig5-data1.xlsx]

## Sheet: L
	crCi WT	crCiP(1-3)A	crCi-S849A	CrCi-∆1270-1370	gCi-Wt	gCi-S849A
PKA Ant	0.373294	0.293158	0.575425	0.309711	0.171991	0.295181
PKA Clone	0.777739	0.752725	0.709353	0.338087	0.308712	0.36783
Cos2 Ant	0.207346	0.270005	0.495364	0.34981
Cos2 Clone	0.48501	0.50382	0.542566	0.421619
PKA Anterior SE	0.038649	0.032838	0.00814799	0.0238991	0.00928556	0.0235174
PKA Clone SE	0.041642	0.0413616	0.0690305	0.0249411	0.0190596	0.0272612
Cos2 Anterior SE	0.0117094	0.0314931	0.0210316	0.0139985
Cos2 Clone SE	0.03642	0.0343045	0.0677578	0.0163654
PKA Clone P	P < 0.0001	P = 0.0220	P < 0.0001	0.4213	P < 0.0001	P = 0.0607
Cos2 Clone P	P < 0.0001	P = 0.3259	P < 0.0001	P = 0.0076

## Sheet:  L raw
2R cos Wt
	Plz
2019-03-05												9-27-19					AVERAGE	SE				crCi WT	crCiP(1-3)A	crCi-S849A	CrCi-∆1270-1370	gCi-Wt	gCi-S849A
Disc 1	clone 1	clone 2	clone 3	Average		Disc2	clone 1	clone 2	clone 3			Disc 3	clone 1	clone 2	clone 3	Average					PKA Ant	0.373294	0.293158	0.575425	0.309711	0.171991	0.295181
Clone	41.056	34.765	38.043			Clone	1212.55	1116.9	1292.51			Clone	898.546	690.238	1140.77						PKA Clone	0.777739	0.752725	0.709353	0.338087	0.308712	0.36783
AP Border	106.574	107.458	90.174	101.402		AP Border	2086.35	2474.57	2060.79	2207.24		AP Border	1542.36	1664	1907.86	1704.74					Cos2 Ant	0.207346	0.270005	0.495364	0.34981
Anterior	17.068	15.099	19.327	17.1647		Anterior	482.937	548.974	510.566	514.159		Anterior	351.952	339.386	432.815	374.718	Average	SE	SD		Cos2 Clone	0.48501	0.50382	0.542566	0.421619
clone R	0.404892	0.34285	0.375178				0.549361	0.506028	0.585589				0.527099	0.404903	0.669191		0.48501	0.03642	0.10926
Ant R	0.168323	0.148905	0.190602				0.218801	0.24872	0.231318				0.20646	0.199088	0.253895		0.207346	0.0117094	0.0351282		PKA Anterior SE	0.038649	0.032838	0.00814799	0.0238991	0.00928556	0.0235174
																					PKA Clone SE	0.041642	0.0413616	0.0690305	0.0249411	0.0190596	0.0272612
																	p=value	P < 0.0001			Cos2 Anterior SE	0.0117094	0.0314931	0.0210316	0.0139985
2R cos P(1-3)A																					Cos2 Clone SE	0.03642	0.0343045	0.0677578	0.0163654
2019-03-05												9-27-19
Disc 1	clone 1	clone 2	clone 3	Average		Disc2	clone 1	clone 2	clone 3			Disc 3	clone 1	clone 2	clone 3	Average
Clone	65.826	66.671	58.069			Clone	85.462	97.646	101.083			Clone	86.234	78.51	87.165
AP Border	165.312	140.218	143.174	149.568		AP Border	188.438	173.034	157.375	172.949		AP Border	151.879	155.115	160.437	155.81
Anterior	35.074	34.883	27.391	32.4493		Anterior	37.76	41.795	49.855	43.1367		Anterior	57.114	54.912	48.582	53.536	Average	SE	SD
clone R	0.440013	0.445662	0.388162				0.494286	0.564754	0.584633				0.553492	0.503915	0.559467		0.50382	0.0677578	0.0677578
Ant R	0.234452	0.233175	0.183095				0.218392	0.241729	0.288346				0.366585	0.352452	0.311823		0.270005	0.0210316	0.0630948
		2019-08-08																P < 0.0001
2R cos Ci∆1270-1370
																		AP correction of 67%
Disc 1	clone 1	clone 2	clone 3	Average		Disc2	clone 1	clone 2	clone 3
Clone	493.624	475.186	458.611			Clone	726.324	782.881	711.736
AP Border	701.869	892.838	780.734	791.814		AP Border	1160.62	1116.14	1100.23	1125.66
Anterior	406.724	395.703	388.091	396.839		Anterior	659.631	575.675	598.531	611.279								Correction	SE	SD
clone R	0.62342	0.600134	0.579201				0.64522	0.695461	0.632261								0.629283	0.421619	0.0163654	0.0400868
Ant R	0.51367	0.499751	0.490138				0.585974	0.511393	0.531697								0.522104	0.34981	0.0139985	0.0342892
2R cos S849A																		P = 0.0076
Disc 1	Plz					Disc 2	Plz
	Wt	cos2					Wt	cos2					Wt	cos2
Disc 1	clone 1	clone 2	clone 3	Average		Disc2	clone 1	clone 2	clone 3			Disc 3	clone 1	clone 2	clone 3	Average
Clone	747.096	700.426	733.513			Clone	752.257	804.16	958.07			Clone	570.979	716.105	686.904
AP Border	1157.6	1260.96	1169.82	1196.13		AP Border	1633.48	1451.31	1109.65	1398.15		AP Border	1777.64	1416.4	1502.81	1565.62
Anterior	666.795	712.106	712.587	697.163		Anterior	752.271	651.87	766.628	723.59		Anterior	537.417	574.883	698.738	603.679	Average	SE
clone R	0.624662	0.58564	0.613305				0.538095	0.575222	0.685315				0.364703	0.4574	0.438748		0.542566	0.0343045	0.102914
Ant R	0.557521	0.595406	0.595809				0.538105	0.466288	0.548375				0.343266	0.367197	0.446307		0.495364	0.0314931	0.0944794
PKA																		P = 0.3259
40apka wt	1-31-20
Disc 1	Plz					Disc2	Plz	2020-11-02				Disc 3	Plz	2019-07-05
	Wt	pka					Wt	pka					Wt	pka
Disc 1	clone 1	clone 2	clone 3	Average		Disc2	clone 1	clone 2	clone 3	Average		Disc 3	clone 1	clone 2	clone 3	Average
Clone	1101.92	1308.05	1243.72			Clone	1173.31	674.68	871.854			Clone	43.938	56.333	47.931
AP Border	1476.84	1617.45	1390.18	1494.82		AP Border	1400.13	1064.2	1089.19	1184.51		AP Border	65.924	67.072	63.885	65.627
Anterior	488.091	474.535	495.648	486.091		Anterior	302.379	338.393	323.305	321.359		Anterior	32.774	36.04	34.189	34.3343	Average	SE
clone R	0.737172	0.87507	0.832034				0.990555	0.569591	0.736052				0.669787	0.858735	0.730655		0.777739	0.041642	0.124926
Ant R	0.326526	0.317457	0.331581				0.25528	0.285684	0.272946				0.499604	0.54939	0.521174		0.373294	0.038649	0.115947
40apka P(1-3)A		2017-11-10																P < 0.0001
	Plz						Plz						Plz
	Wt	pka				2017-06-10	Wt	pka					Wt	pka
Disc 1	clone 1	clone 2	clone 3	Average		Disc2	clone 1	clone 2	clone 3			Disc 3	clone 1	clone 2	clone 3	Average
Clone	43.247	49.242	42.711			Clone	52.552	51.572	54.476			Clone	44.125	44.592	47.895
AP Border	57.026	74.514	57.407	62.9823		AP Border	87.483	95.731	91.403	91.539		AP Border	64.36	77.51	58.835	66.9017
Anterior	19.039	18.146	16	17.7283		Anterior	24.442	29.138	26.155	26.5783		Anterior	22.28	19.112	20.343	20.5783	Average	SE
clone R	0.905175	1.18276	0.911222				0.574339	0.563628	0.595366				0.659567	0.666547	0.715919		0.752725	0.0690305	0.207091
Ant R	0.302206	0.288032	0.253968				0.267126	0.318448	0.285847				0.333034	0.28568	0.304081		0.293158	0.00814799	0.024444
2L PKA S849A																		P < 0.0001
	Plz
Disc 1	clone 1	clone 2	clone 3	Average		Disc2	clone 1	clone 2	clone 3			Disc 3	clone 1	clone 2	clone 3	Average
Clone	39.294	44.133	47.644			Clone	41.222	47.887	53.867			Clone	65.087	64.18	83.247
AP Border	68.302	65.69	61.075	65.0223		AP Border	70.763	68.446	89.466	76.225		AP Border	92.074	76.292	87.444	85.27
Anterior	36.217	38.815	38.007	37.6797		Anterior	37.857	37.377	31.529	35.5877		Anterior	58.408	61.86	53.631	57.9663	Average	SE	Sd
clone R	0.604523	0.678969	0.732985				0.540971	0.628438	0.706916				0.763036	0.752403	0.975932		0.709353	0.0413616	0.124085
Ant R	0.557185	0.597154	0.584723				0.496811	0.490512	0.413766				0.684736	0.725205	0.628734		0.575425	0.032838	0.098514
																			P = 0.0220
2L PKA 1270_1370
	Plz
Disc 1	clone 1	clone 2	clone 3	Average		Disc2	clone 1	clone 2	clone 3			Disc 3	clone 1	clone 2	clone 3	Average		AP correction of 67%
Clone	389.632	502.361	384.876			Clone	469.707	333.953	411.737			Clone	493.779	535.58	634.792
AP Border	921.632	977.08	897.689	932.134		AP Border	764.141	615.05	855.869	745.02		AP Border	1076.73	1153.24	1011.94	1080.64
Anterior	396.897	413.398	418.413	409.569		Anterior	324.27	367.223	414.178	368.557		Anterior	429.071	410.308	627.881	489.087		Average	SE	Sd
clone R	0.41806	0.539014	0.412957				0.630479	0.448259	0.552667				0.456949	0.495632	0.587444		0.504607	0.338087	0.0853373	0.0771495
Ant R	0.425855	0.44356	0.448941				0.435262	0.492917	0.555944				0.397067	0.379704	0.581048		0.462255	0.309711	0.0765692	0.0684416
2L PKA gCi-Wt																			P = 0.4213
	Plz
Disc 1	clone 1	clone 2	clone 3	Average		Disc2	clone 1	clone 2	clone 3			Disc 3	clone 1	clone 2	clone 3	Average
Clone	45.548	49.481	36.471			Clone	28.156	47.29	33.466			Clone	44.497	45.262	45.641
AP Border	133.687	147.289	137.296	139.424		AP Border	109.002	102.249	114.502	108.584		AP Border	176.654	147.84	163.683	162.726
Anterior	20.841	24.082	23.662	22.8617		Anterior	22.353	21.201	23.251	22.2683		Anterior	26.04	21.711	23.963	23.9047	Average	SE
clone R	0.326743	0.354957	0.261628				0.259263	0.435451	0.308158				0.273491	0.278193	0.280522		0.308712	0.0190596	0.0571789	P = 0.0026
Ant R	0.149505	0.172755	0.169742				0.205829	0.195221	0.214098				0.160049	0.133442	0.147283		0.171991	0.00928556	0.0278567
2L PKA gCi-S849A
	Plz
Disc 1	clone 1	clone 2	clone 3	Average		Disc2	clone 1	clone 2	clone 3			Disc 3	clone 1	clone 2	clone 3	Average
Clone	44.745	46.964	48.812			Clone	50.09	36.373	42.576			Clone	35.082	34.356	41.642
AP Border	162.477	160.661	157.965	160.368		AP Border	81.7	96.952	105.631	94.761		AP Border	90.277	103.333	116.973	103.528
Anterior	37.021	40.541	39.351	38.971		Anterior	40.573	35.31	33.104	36.329		Anterior	28.704	27.6	24.229	26.8443	Average	SE	SD
clone R	0.278959	0.292793	0.304314				0.528376	0.383681	0.449114				0.338957	0.331942	0.402338		0.36783	0.0272612	0.0817837	P = 0.0607
Ant R	0.230804	0.252749	0.24533				0.427985	0.372468	0.349198				0.277333	0.266667	0.234097		0.295181	0.0235174	0.0705523
