# Supplementary material for: Drosophila hedgehog can act as a morphogen in the absence of regulated Ci processing
Source: eLife. 2020 Oct 21;9:e61083. doi: 10.7554/eLife.61083 (PMC7679133; doi:10.7554/eLife.61083)
Supplement: Figure 6—source data 1. [file elife-61083-fig6-data1.xlsx]

## Sheet: Figure 6
		crCi WT	crCiCORD	crCiCDN	Ci CDNCORD	gCi Wt	gCi CORD
Average	PKA	0.628329	0.886655	0.638386	0.74894	0.165149	0.74894
	Cos	0.352854	0.404852	0.345505	0.408557
SE	PKA	0.0720095	0.0482755	0.0513943	0.0263604	0.0216994	0.0263604
	Cos	0.0401992	0.0366743	0.120076	0.0818386
P-Value	PKA		P = 0.0352	P = 0.9201	P = 0.2115	P < 0.0001	P = 0.2115
	Cos		P = 0.3852	P = 0.9469	P = 0.5106

## Sheet: raw data
2R cos Wt
	Plz
2019-03-05												9-27-19
Disc 1	clone 1	clone 2	clone 3	Average		Disc2	clone 1	clone 2	clone 3			Disc 3	clone 1	clone 2	clone 3	Average
Clone	41.056	34.765	38.043			Clone	1212.55	1116.9	1292.51			Clone	898.546	690.238	1140.77
AP Border	106.574	107.458	90.174	101.402		AP Border	2086.35	2474.57	2060.79	2207.24		AP Border	1542.36	1664	1907.86	1704.74
Anterior	17.068	15.099	19.327	17.1647		Anterior	482.937	548.974	510.566	514.159		Anterior	351.952	339.386	432.815	374.718
Posterior	28.033	27.338	28.308	27.893		Posterior	722.226	816.742	616.168	718.379		Posterior	504.349	440.648	432.382	459.126
Ratio	0.283619	0.208937	0.247851	-0.1058		Ratio	0.412498	0.356006	0.459726	-0.0925227		Ratio	0.39385	0.23723	0.57597	-0.0495142
2R cos ∆CORD
2019-03-05	Plz
Disc 1	clone 1	clone 2	clone 3	Average		Disc2	clone 1	clone 2	clone 3
Clone	50.974	58.092	57.89			Clone	86.419	75.206	92.534
AP Border	127.904	88.063	87.181	101.049		AP Border	175.679	120.146	121.983	139.269
Anterior	29.696	31.935	32.202	31.2777		Anterior	35.771	43.274	35.507	38.184
Posterior	25.28	26.848	33.259	28.4623		Posterior	45.847	46.473		46.16
Ratio	0.282297	0.384316	0.38142	0.027861		Ratio	0.477171	0.366245	0.537665	-0.0572703
2R cos ∆CDN
2020-07-02	Plz
Disc 1	clone 1	clone 2	clone 3	Average		Disc2	clone 1	clone 2	clone 3
Clone	760.889	605.327	869.848			Clone	493.77	1143.06	493.77
AP Border	1432.15	1326.6	1601.52	1453.42		AP Border	1257.01	1208.74	1283.16	1249.63
Anterior	300.948	426.966	437.369	388.428		Anterior	427.595	425.318	383.622	412.178
Posterior	478.699	531.272	453.062	487.678		Posterior	468.2	533.715	471.812	491.242
Ratio	0.349731	0.203662	0.45204	-0.0682871		Ratio	0.0974279	0.872741	0.0974279	-0.0632697
2R cos ∆CDN ∆CORD
2-18-2020	Plz
Disc 1	clone 1	clone 2	clone 3	Average		Disc2	clone 1	clone 2	clone 3
Clone	1667.09	1277.79	869.848			Clone	1632.62	1218.74	1843.64
AP Border	3192.27	2714.31	2169.7	2692.09		AP Border	3241.07	1968.56	3019.56	2743.06
Anterior	300.948	642.255	586.603	509.935		Anterior	517.145	693.945	625.632	612.241
Posterior	724.277	649.633	865.248	746.386		Posterior	671.011	617.555	797.302	695.289
Ratio	0.530279	0.351877	0.164934	-0.0878316		Ratio	0.478865	0.284633	0.577898	-0.0302759
PKA
40apka wt	1-31-20
Disc 1	Plz					Disc2	Plz	2020-11-02				Disc 3	Plz	2019-07-05
	Wt	pka					Wt	pka					Wt	pka
Disc 1	clone 1	clone 2	clone 3	Average		Disc2	clone 1	clone 2	clone 3	Average		Disc 3	clone 1	clone 2	clone 3	Average
Clone	1101.92	1308.05	1243.72			Clone	1173.31	674.68	871.854			Clone	43.938	56.333	47.931
AP Border	1476.84	1617.45	1390.18	1494.82		AP Border	1400.13	1064.2	1089.19	1184.51		AP Border	65.924	67.072	63.885	65.627
Anterior	488.091	474.535	495.648	486.091		Anterior	302.379	338.393	323.305	321.359		Anterior	32.774	36.04	34.189	34.3343
Posterior	402.228	519.846	338.976	420.35		Posterior	472.479	510.263	506.903	496.548		Posterior	28.598	32.896	28.669	30.0543
Ratio	0.610502	0.814847	0.751074	0.0439793		Ratio	0.987028	0.409339	0.637775	-0.1479		Ratio	0.306898	0.702998	0.4345	0.0652171
PKA
40apka ∆CORD
Disc 1	Plz	2019-07-05
	Wt	pka
Disc 1	clone 1	clone 2	clone 3	clone 4	clone5	Average
Clone	95.27	119.718	124.365	118.648	125.28
AP Border	105.043	141.235	132.554			126.277
Anterior	36.778	47.104	40.3			41.394
Posterior	44.038	33.759	48.503			42.1
Ratio	0.634706	0.922725	0.977471	0.91012	0.988251	-0.00559087
PKA
40apka ∆CDN	1-31-20
Disc 1	Plz					Disc2	Plz
	Wt	pka					Wt	pka
Disc 1	clone 1	clone 2	clone 3	Average		Disc2	clone 1	clone 2	clone 3	Average
Clone	1303.03	1203.58	1500.58			Clone	1237.89	1403	1061.8
AP Border	1932.03	1859.41	1776.35	1855.93		AP Border	1686.88	1581.25	1544.89	1604.34
Anterior	559.201	556.019	516.829	544.016		Anterior	496.14	462.549	455.804	471.498
Posterior	540.235	724.886	485.861	583.661		Posterior	519.164	621.714	610.825	583.901
Ratio	0.578552	0.502749	0.729135	-0.0213609		Ratio	0.676527	0.822271	0.521082	-0.0700621
PKA
40apka ∆CDN∆CORD
Disc 1	Plz					Disc2	Plz	2020-11-02
	Wt	pka					Wt	pka
Disc 1	clone 1	clone 2	clone 3	Average		Disc2	clone 1	clone 2	clone 3	Average
Clone	2062.12	1959.5	2308.01			Clone	1819.68	1739.93	1753.21
AP Border	2399.94	2791.07	2788.69	2659.9		AP Border	1982.83	2591.11	1753.91	2109.28
Anterior	592.386	753.929	617.559	654.625		Anterior	655.926	564.85	651.943	624.24
Posterior	887.713	985.275	686.688	853.225		Posterior	829.495	910.532	841.605	860.544
Ratio	0.701898	0.650721	0.824517	-0.0746646		Ratio	0.804989	0.751285	0.760228	-0.112031
2L PKA gCi-Wt	9-29-18
	Plz
Disc 1	clone 1	clone 2	clone 3	Average		Disc2	clone 1	clone 2	clone 3			Disc 3	clone 1	clone 2	clone 3	Average
Clone	45.548	49.481	36.471			Clone	28.156	47.29	33.466			Clone	44.497	45.262	45.641
AP Border	133.687	147.289	137.296	139.424		AP Border	109.002	102.249	114.502	108.584		AP Border	176.654	147.84	163.683	162.726
Anterior	20.841	24.082	23.662	22.8617		Anterior	22.353	21.201	23.251	22.2683		Anterior	26.04	21.711	23.963	23.9047
Posterior	34.441	35.784	32.367	34.1973		Posterior	21.449	23.631	17.892	20.9907		Posterior	37.778	33.558	32.704	34.68
Ratio	0.194628	0.22837	0.116756	-0.0813036		Ratio	0.0682106	0.289884	0.129729	0.0117666		Ratio	0.148337	0.153848	0.156578	-0.0662178
2L PKA gCi-∆CORD
	Plz
	2015-02-10
Disc 1	clone 1	clone 2	clone 3	Average		Disc2	clone 1	clone 2	clone 3			Disc 3	clone 1	clone 2	clone 3	Average
Clone	36.722	55.012	54.206			Clone	36.722	47.653	47.755			Clone	69.34	43.526	63.842
AP Border	106.628	125.059	104.57	112.086		AP Border	64.482	71.658	79.914	72.018		AP Border	80.983	73.899	78.963	77.9483
Anterior	27.53	20.1	26.589	24.7397		Anterior	24.027	20.409	19.491	21.309		Anterior	22.689	18.846	18.379	19.9713
Posterior	23.043	19.593	25.46	22.6987		Posterior	34.426	38.606	34.105	35.7123		Posterior	26.429	26.087	34.246	28.9207
Ratio	0.137182	0.34658	0.337352	0.0182093		Ratio	0.30395	0.519513	0.521525	-0.199996		Ratio	0.851522	0.406276	0.756691	-0.114811
